TRIM6 and WNV

**VAMP8 contributes to TRIM6-mediated type-I interferon antiviral response during West Nile  
virus infection**

Colm Atkins<sup>a,\*</sup>, Sarah van Tol<sup>b,\*</sup>, Preeti Bharaj<sup>b</sup>, Ricardo Rajsbaum<sup>b,c,#</sup>, Alexander N. Freiberg<sup>a,c,d,#</sup>

<sup>a</sup>Department of Pathology, University of Texas Medical Branch, Galveston, TX, USA

<sup>b</sup>Department of Microbiology and Immunology, University of Texas Medical Branch, Galveston, TX,  
USA

<sup>c</sup>Institute for Human Infections and Immunity, University of Texas Medical Branch, Galveston, TX,  
USA

<sup>d</sup>Center for Biodefense and Emerging Infectious Diseases, University of Texas Medical Branch,  
Galveston, TX, USA

Running Head: TRIM6 regulated WNV replication

#Address correspondence to:

Ricardo Rajsbaum, [rirajsba@utmb.edu](mailto:rirajsba@utmb.edu)

Alexander N Freiberg, [anfreibe@utmb.edu](mailto:anfreibe@utmb.edu)

\* C.A and S.v.T. contributed equally to this work.

Abstract Word Count: 249

Text Word Count: 4047

Figures: 7

Tables: 1

## TRIM6 and WNV

### 25 **ABSTRACT**

26 Members of the tripartite motif (TRIM) family of E3 ubiquitin ligases regulate immune pathways  
27 including the antiviral type I interferon (IFN-I) system. Previously, we demonstrated that TRIM6 is  
28 involved in IFN-I induction and signaling. In absence of TRIM6 function, optimal IFN-I signaling is  
29 reduced, allowing increased replication of interferon-sensitive viruses. Despite numerous  
30 mechanisms to restrict vertebrate host's IFN-I response, West Nile Virus (WNV) replication is  
31 sensitive to pre-treatment with IFN-I. However, the regulators and products of the IFN-I pathway  
32 important in regulating WNV replications are incompletely defined. Consistent with WNV's sensitivity  
33 to IFN-I, we found that in TRIM6 knockout (TRIM6 KO) A549 cells WNV replication is significantly  
34 increased. Additionally, induction of *Irfn* mRNA was delayed and the expression of several IFN-  
35 stimulated genes (ISGs) was reduced in TRIM6 KO cells. IFN $\beta$  pre-treatment was more effective in  
36 protecting against subsequent WNV infection in wt cells, indicating that TRIM6 contributes to the  
37 establishment of an IFN-induced antiviral response against WNV. Using next generation sequencing,  
38 we identified potential factors involved in this TRIM6-mediated antiviral response. One identified  
39 gene, VAMP8, is a soluble N-ethylmaleimide-sensitive factor attachment protein receptors (SNARE)  
40 in the vesicle-associated membrane protein subfamily. Knockdown of VAMP8 resulted in reduced  
41 STAT1 phosphorylation and impaired induction of several ISGs following WNV infection or IFN $\beta$   
42 treatment. Therefore, VAMP8 is a novel gene involved in the regulation of IFN-I signaling, and its  
43 expression is dependent on TRIM6 function. Overall, these results indicate that TRIM6 contributes to  
44 the antiviral response against WNV by regulating the IFN-I system.

## TRIM6 and WNV

### 46 **IMPORTANCE**

47 WNV is a mosquito-borne flavivirus that poses threat to human health across large discontinuous  
48 areas throughout the world. Infection with WNV results in febrile illness, which can progress to severe  
49 neurological disease. Currently, there are no approved treatment options to control WNV infection.  
50 Understanding the cellular immune responses that regulate viral replication is important in diversifying  
51 the resources available to control WNV. Here we show that the elimination of TRIM6 in human cells  
52 results in an increase in WNV replication and alters the expression and function of other components  
53 of the IFN-I pathway through VAMP8. Dissecting the interactions between WNV and host defenses  
54 both informs basic molecular virology and promotes the development of host- and viral-targeted  
55 antiviral strategies.

56

## TRIM6 and WNV

### 57 INTRODUCTION

58 West Nile Virus (WNV) is an enveloped positive sense single stranded RNA virus and a member of  
59 the family *Flaviviridae* (1, 2). Mosquitoes competent for WNV (predominantly *Culex*) transmit the virus  
60 through blood feeding. Enzootic transmission cycles between birds and mosquitoes maintain the virus  
61 in the environment, but mosquitoes also incidentally infect humans and other mammals that act as  
62 dead-end hosts. In 1999, WNV was introduced to North America and has since then become an  
63 endemic pathogen, causing annual outbreaks in human populations, and is the leading cause of  
64 mosquito-borne encephalitis (3). Although primarily asymptomatic, WNV infection causes flu-like  
65 symptoms in approximately 20% of infected humans with fewer than 1% of symptomatic cases  
66 progressing to neurologic manifestations (4). The case fatality rate for symptomatic cases is  
67 approximately 10% (1). Currently, no WNV vaccines or anti-viral treatments are approved for human  
68 use (5–9).

69 Understanding the molecular mechanisms of WNV replication at the host cellular level, and  
70 specifically WNV-host IFN-I interactions, may allow identifying targets for antiviral development. Many  
71 groups have demonstrated that interferon-stimulated gene (ISG) products, such as ISG54 (IFIT2)  
72 (10), IFITM3 (11), and Oas1b (12), and others (Reviewed in: (13)) restrict WNV replication. Further, in  
73 mouse models of WNV infection, lack of IFN-I induction through signaling factors such as TLR3 (14,  
74 15), IRF7 (14), RIG-I (16), IFN $\beta$  (2, 17), IFNAR (14), STAT1 (18), and IKK $\epsilon$  (10) increases  
75 susceptibility to WNV. Mutations in IFN-I pathway genes and ISGs have also been associated with  
76 increased disease during WNV infections in humans (19, 20). Despite WNV's sensitivity to IFN-I,  
77 WNV has evolved several mechanisms to antagonize IFN-I including NS1 interference with RIG-I and  
78 MDA5 (21), NS3 helicase impairment of Oas1b activity (12), NS5 disruption of the type-I interferon  
79 receptor (IFNAR) surface expression (22), STAT1 phosphorylation (23), and subgenomic flavivirus  
80 RNA (24). Since WNV's resistance to IFN-I contributes to virulence (14, 25), defining the IFN-I

## TRIM6 and WNV

81 signaling pathway components required to respond to WNV infection is important in aiding the  
82 development of WNV-specific therapies.

83 Upon WNV infection, pathogen recognition receptors including RIG-I and MDA5 recognize viral RNA  
84 (16) and signal through their adaptor MAVS to activate downstream IKK-like kinases TBK1 and IKK $\epsilon$ .  
85 Activation of TBK1 and IKK $\epsilon$  promote IFN-I production through activation of transcription factors IRF3  
86 and IRF7 (26). IFN-I is then secreted and engages the IFN-I receptor to induce IFN-I signaling. Early  
87 in the IFN-I signaling cascade, the kinases Jak1 and Tyk2 phosphorylate STAT1 (Y701) and STAT2  
88 (Y690), which dimerize and interact with IRF9 to form the ISGF3 complex (27, 28). ISGF3 interacts  
89 with interferon-stimulated response element (ISRE) present in the promoter of ISGs. In addition, upon  
90 IFN-I stimulation, IKK $\epsilon$  plays an essential role in phosphorylation of STAT1 on S708, which is  
91 required for induction of IKK $\epsilon$ -dependent ISGs leading to an optimal antiviral response (29). Several  
92 IKK $\epsilon$ -dependent ISGs, including ISG54, are involved in restricting WNV (10).

93 TRIM6, an E3 ubiquitin ligase in the tripartite motif (TRIM) protein family, plays a crucial role in  
94 facilitating the activation of the IKK $\epsilon$ -dependent branch of the IFN-I signaling pathway. In concert with  
95 the ubiquitin activating (E1) and the E2 ubiquitin conjugating enzyme Ube2K, TRIM6 synthesizes  
96 unanchored K48-linked polyubiquitin chains that promote the oligomerization and  
97 autophosphorylation of IKK $\epsilon$  (T501) (30). Following phosphorylation of T501, IKK $\epsilon$  is activated and  
98 phosphorylates STAT1 (S708) to promote the transcription of the IKK $\epsilon$ -dependent ISGs (30). Due to  
99 TRIM6's role in activating IKK $\epsilon$ -dependent IFN-I signaling and the importance of IKK $\epsilon$ -specific ISGs in  
100 restricting WNV, we hypothesized that WNV replication would be enhanced in the absence of TRIM6.  
101 Here we show that WNV viral load is increased and that IFN-I induction and IKK $\epsilon$ -dependent IFN-I  
102 signaling are impaired in TRIM6-knockout (TRIM6-KO) cells. Next-generation RNA sequencing  
103 (NGS) identified several ISGs expressed at lower levels in TRIM6-KO cells compared to wild-type  
104 (wt) cells, as well as several ISGs differentially expressed in TRIM6-KO cells previously described to

## TRIM6 and WNV

105 restrict WNV replication. We investigated the role of a TRIM6-dependent gene not previously  
106 described to regulate WNV replication or IFN-I signaling, *Vamp8*. VAMP8 is a vesicle-associated-  
107 membrane protein in the SNARE (Soluble-*N*-ethylmaleimide-sensitive factor attachment protein)  
108 family known to modulate endocytosis (31), exocytosis of secretory (32–35) and lytic (36) granules,  
109 thymus development (37), receptor exocytosis (38), and cross-presentation by antigen presenting  
110 cells (39). We found that VAMP8 did not directly affect WNV replication, but does promote optimal  
111 IFN-I signaling. Overall, we conclude that TRIM6 is important in promoting optimal IFN-I induction and  
112 signaling during WNV infection and that VAMP8 is a novel TRIM6-dependent factor involved in  
113 regulating IFN-I signaling.

## 114 RESULTS

### 115 WNV Replication is Increased in IFN-I Induction and Signaling Impaired TRIM6-KO Cells

116 To test our hypothesis that the absence of TRIM6 facilitates WNV replication, growth kinetics at a MOI  
117 of 0.1 were determined in wt and TRIM6-KO A549 cells, respectively. A significant increase in viral  
118 replication was detected in TRIM6-KO cells at 48 hours post infection (hpi) in comparison to wt cells  
119 (Figure 1A). To address the effect of the absence of TRIM6 on the IFN-I pathway, protein expression  
120 and phosphorylation of IFN-I pathway components in WNV infected cells were assessed (Figure 1B).  
121 No differences in the levels of TBK1 phosphorylation or total TBK1 expression were detected  
122 between wt and TRIM6-KO cells (Figure 1B). While the levels of pIKK $\epsilon$  (S172), a TRIM6-independent  
123 post-translational modification, were not significantly different between wt and TRIM6-KO cells, the  
124 TRIM6-dependent phosphorylation on IKK $\epsilon$  (T501) was substantially lower in the TRIM6-KO cells  
125 (Figure 1B), consistent with our previous reports that TRIM6 is important for IKK $\epsilon$  activation (30). In  
126 line with these findings, IRF3 phosphorylation, a marker of IFN $\beta$  induction, was also reduced in  
127 TRIM6-KO cells (Figure 1B). Although these results suggest that there is reduced IFN-I induction in  
128

## TRIM6 and WNV

129 TRIM6-KO cells, STAT1 (Y701) phosphorylation (IKK $\epsilon$  and TRIM6-independent (29, 30)) was not  
130 significantly affected, suggesting that there is enough IFN-I induced during WNV infection. To further  
131 characterize IFN-I signaling in TRIM6-KO cells, RNA expression levels for *ifnB* and selected ISGs  
132 were analyzed (Figure 1C). Indeed, *ifnB* mRNA is reduced in TRIM6-KO cells only at early time points  
133 p.i. and is later significantly increased as compared to wt cells (Figure 1C). The amount of total  
134 STAT1 protein, which is itself an IKK $\epsilon$ -independent ISG (29), is substantially increased in TRIM6-KO  
135 relative to wt cells at the later time points (48-72 hp.i., Figure 1B), consistent with the higher levels of  
136 *ifnB* mRNA observed in TRIM6-KO cells (Figure 1C). The high levels of *ifnB* mRNA observed at 48 hpi  
137 in TRIM6-KO cells (Figure 1C) are probably due to the increased viral replication, and possible  
138 redundancy of other TRIM6/IKK $\epsilon$ -independent pathways in IFN-I induction. Increased total STAT1 in  
139 TRIM6-KO cells is also consistent with the reported accumulation of unphosphorylated STAT1 in  
140 IKK $\epsilon$ -KO cells (40) . However, phosphorylation on STAT1 (S708), an IKK $\epsilon$  and TRIM6-dependent  
141 modification (29, 30), is nearly undetectable in the TRIM6-KO cells upon WNV infection (Figure 1B).  
142 Consistent with this defect in the TRIM6-IKK $\epsilon$  branch of the IFN-I signaling pathway in TRIM6-KO  
143 cells, the TRIM6/IKK $\epsilon$ -dependent ISGs *Isg54* and *Oas1* (29, 30), have different patterns of induction.  
144 In the case of *Isg54*, induction is significantly lower in the TRIM6-KO cells than in wt cells at 24 hpi,  
145 but this pattern is reversed at 72 hpi mirroring *ifnB* expression (Figure 1C). In contrast, induction of  
146 *Oas1* is attenuated in TRIM6-KO cells 24-72 hpi (Figure 1C). IKK $\epsilon$ -independent ISGs *Irf7* and *Stat1*  
147 and non-ISG *Il-6* are expressed at higher levels in TRIM6-KO cells at later time points (Figure 1C),  
148 again in correlation with *ifnB* induction. Overall, the absence of TRIM6 augments WNV replication and  
149 impairs the IKK $\epsilon$ -dependent branch of the IFN-I pathway, in line with our previous findings with other  
150 viruses including Influenza, Sendai and Encephalomyocarditis (30).

## TRIM6 and WNV

### 153 **IFN-I has reduced anti-WNV activity in TRIM6-deficient cells**

154 Next, we sought to evaluate further the impact of TRIM6 on the antiviral efficiency of IFN-I against  
155 WNV. Prior to infection, wt and TRIM6-KO A549 cells were treated with 100U of recombinant human  
156 IFN $\beta$  for 4 hours prior to infection with WNV (Mol 5.0) for 24 hours (Figure 2). Pre-treatment with IFN $\beta$   
157 decreased viral load in both wt and TRIM6-KO cells, however IFN-I pre-treatment was significantly  
158 less effective in inhibiting WNV replication in TRIM6-KO (40 fold) as compared to wt controls (63  
159 fold). As expected, this result indicates that IFN-I signaling is suboptimal in the absence of TRIM6,  
160 enabling WNV to replicate to higher titers, and suggests that expression of TRIM6-dependent ISGs  
161 may be involved in establishing an optimal IFN-I mediated anti-WNV response.

### 163 **VAMP8 is induced in a TRIM6-dependent manner**

164 To identify other genes affected as a consequence of TRIM6's absence, next generation sequencing  
165 (NGS) of mock (Figure 3A) and WNV-infected (Figure 3B) wt and TRIM6-KO cells was performed.  
166 During WNV infection, canonical ISGs were identified as being expressed at lower levels in the  
167 TRIM6-KO compared to wt cells, which validates the methodology (Figure 3B). Several canonical  
168 ISGs down-regulated in TRIM6-KO cells have previously been described to antagonize WNV  
169 replication, including *Ifitm2* (41) and *-3* (11), or their loss of function is associated with increased WNV  
170 susceptibility, including *Mx1* and *OasL* (42). We elected to investigate other genes not previously  
171 described to regulate WNV replication or IFN-I pathways. A strongly downregulated gene in both  
172 mock and infected cells, VAMP8, was chosen as a target for further mechanistic validation (Figure  
173 3A).

174 After confirming that VAMP8 was expressed lower at the translational (Figure 3C) and transcriptional  
175 (Figure 3D) levels in TRIM6-KO cells, the role of VAMP8 in regulating WNV replication was  
176 interrogated. Therefore, wt A549 cells were transfected with a VAMP8-targeting siRNA pool or non-



## TRIM6 and WNV

targeting control siRNA (ntc) for 24 hours prior to WNV infection (Moi 0.1). VAMP8 knockdown (kd) had no measurable effect on WNV replication (Figure 4A). VAMP8-kd was validated by western blot, showing undetectable levels of protein, with a clear upregulation in VAMP8 protein by 24 hpi in ntc transfected cells (Figure 4B). Phosphorylation of IRF3 in VAMP8-kd cells was not significantly affected as compared to ntc-kd cells, suggesting there is no defect in IFN-I induction (Figure 4B). In contrast, phosphorylated STAT1 (Y701) was significantly lower in the VAMP8-kd cells at 48 and 72 hpi, suggesting impairment in IFN-I signaling (Figure 4B).

Subsequently, to examine whether VAMP8 is involved in regulation of the IFN-I signaling pathway, wt A549 cells were transfected with VAMP8-targeting or ntc siRNAs for 24 hours and treated with IFN $\beta$  for 12 hours. As expected, total STAT1 was induced in both VAMP8- and ntc-kd cells following IFN $\beta$  stimulation, but the level of total STAT1 in VAMP8-kd cells was slightly attenuated (Figure 5A). VAMP8's effect on STAT1 activation is more evident; however, with a strong reduction in the amount of pSTAT1 (Y701) (Figure 5A). Consistent with a potential role of VAMP8 in regulating STAT1 phosphorylation, mRNA expression levels upon IFN $\beta$  treatment of ISGs including *Stat1*, *Isg54*, and *Oas1* was significantly reduced in VAMP8-kd as compared to controls (Figure 5B). Overall, the above evidence supports that 1) VAMP8 expression is TRIM6-mediated, 2) VAMP8 does not directly affect WNV replication, and 3) VAMP8 is involved in positive regulation of IFN-I signaling upstream of STAT1 phosphorylation.

## **VAMP8 Knockdown Enhances WNV Replication in Cells Pre-treated with Type I IFN**

Since VAMP8 modulates the IFN-I system, but does not appear to alter WNV replication, we examined whether exogenous IFN-I pre-treatment would reveal a functional defect in IFN-I signaling in VAMP8-kd cells during WNV infection. Prior to infection, wt A549 cells were treated with siRNA (VAMP8 or ntc) for 24 hours followed by a 16-hour treatment with IFN $\beta$ . Although IFN $\beta$  pre-treatment

## TRIM6 and WNV

reduced viral production in both groups, IFN $\beta$  treatment was less efficient in protecting VAMP8-kd cells against WNV replication as compared to ntc (ntc siRNA: 508 fold; VAMP8 siRNA: 79 fold) (Figure 6). As opposed to previous experiments showing no impact on WNV replication following VAMP8-kd, the combination of IFN- $\beta$  pre-treatment and VAMP8 siRNA showed an 8-fold increase in the replication of WNV over cells treated with ntc siRNA and IFN $\beta$ . This result suggests that VAMP8 plays a functional role in IFN-I signaling during WNV infection.

## DISCUSSION

Our study demonstrates the relevance of TRIM6 in regulating the IFN-I pathway during WNV infection and identifies VAMP8 as a factor functionally involved in IFN-I signaling. Extensive research has implicated the TRIM family of proteins in both regulation of the innate immune response and the restriction of viral replication (30, 43–48). Specifically, TRIM6 has been shown to facilitate the formation of unanchored K48-linked polyubiquitin chains that provide a scaffold for IKK $\epsilon$  homooligomerization, ultimately resulting in IKK $\epsilon$  activation and STAT1 phosphorylation at S708 (30). Phosphorylation of STAT1 at S708 is important to sustain IFN-I signaling and to express a unique subset of ISGs (29, 40). The relevance of IKK $\epsilon$ -dependent gene expression has previously been described for WNV, and in the absence of ISG54 or IKK $\epsilon$  mice have an increased susceptibility (10). These experiments served as a rationale for exploring the functional role of TRIM6 during WNV infection.

As expected, we observed an increase in WNV replication in TRIM6-KO cells in parallel with attenuated TRIM6-dependent activation of IKK $\epsilon$  (T501 phosphorylation), IKK $\epsilon$ -dependent STAT1 S708 phosphorylation, and IKK $\epsilon$ -dependent gene expression. There was impaired *Ifnb* and *Isg54* mRNA induction in TRIM6-KO cells at 6 and 24 hpi, respectively, but higher levels of induction at 72 hpi. The transient effect of TRIM6 on the IFN-I pathway may be due to the increased amount of virus

## TRIM6 and WNV

at the peak of infection resulting in more cells producing IFN-I to compensate for TRIM6 deficiency. Although no other factor has been shown to synthesize the unanchored K48-polyubiquitin chains required for IKK $\epsilon$  activation, we cannot exclude that other TRIM members or other E3-Ub ligases may compensate for the loss of TRIM6. Alternatively, TRIM6 may play important roles in other pathways (i.e. NF- $\kappa$ B), resulting in cytokine dysregulation and/or induction of IFN $\beta$  by TRIM6-independent pathways. Furthermore, since no difference in TBK1 phosphorylation is observed between wt and TRIM6-KO cells, it is possible that TBK1 activation is sufficient to compensate for reduced IKK $\epsilon$  activation in the IFN production pathway. Further emergent WNV strains encode a functional 2-O methylase in their non-structural protein 5 that prohibits IFIT proteins, specifically murine ISG54 and human ISG58, from suppressing viral mRNA expression (49). Since WNV antagonizes components of this pathway, we cannot rule out the possibility that WNV proteins target TRIM6 to impede IKK $\epsilon$ -dependent expression of WNV-restricting ISGs. For example, the matrix protein of Nipah virus (family *Paramyxoviridae*) works to promote the degradation of TRIM6 during viral infection to promote viral replication through impaired IKK $\epsilon$  signaling and thus a blunted IFN-I response (44). WNV protein antagonism of TRIM6 could also preclude observing more severe differences in WNV replication between wt and TRIM6-KO cells. Alternatively, TRIM6 could play an essential role in IKK $\epsilon$ -dependent signaling but could also be hijacked by a virus to facilitate viral replication. In a previous study, we showed that TRIM6 directly promotes the replication of ebolavirus (family *Filoviridae*) through interactions with VP35 and that VP35 antagonizes TRIM6's capacity to promote IFN-I signaling (43). Although we identified several ISGs differentially expressed in TRIM6-KO compared to wt cells following WNV infection, we also identified *Vamp8* to be significantly down-regulated under both basal conditions and WNV infection. VAMP8 has not been previously described to affect WNV replication or the IFN-I pathway. Although its role was not described, VAMP8 had been identified as an antiviral factor in an siRNA screen for Japanese encephalitis virus (JEV), another mosquito-borne

## TRIM6 and WNV

249 flavivirus (50). Here we showed, in contrast to that seen with JEV, VAMP8-kd does not directly affect  
250 WNV replication. The impairment of STAT1 Y701 phosphorylation during WNV in the VAMP8-kd cells  
251 lent evidence that VAMP8 could be involved in IFN-I signaling. Since WNV efficiently impairs IFN-I  
252 induction until nearly 24 hpi, VAMP8 depletion may not substantially impede of IFN-I signaling during  
253 WNV infection in a tissue culture system. Evaluation of VAMP8's role in IFN-I signaling in the  
254 absence of WNV infection revealed a striking impairment in STAT1 Y701 phosphorylation and a  
255 modest inhibition of ISG gene expression in VAMP8-depleted cells. Further, following IFN $\beta$  treatment,  
256 cells treated with VAMP8-targeting siRNA less efficiently antagonized WNV replication which  
257 provides support that VAMP8 mediates a functional step in the IFN-I signaling pathway.

258 At this point, VAMP8's role in regulating the IFN-I signaling pathway is unknown. VAMP8 is involved  
259 in endocytosis (31), vesicle-vesicle fusion (34), and exocytosis (32–35) in various cell types including  
260 leukocytes (36, 39), and various secretory (32, 33, 35) cells including human lung goblet cells. As a  
261 vesicular SNARE (v-SNARE), VAMP8 on the surface of a vesicle interacts with SNAREs on the target  
262 membrane surface to facilitate membrane fusion (32, 34, 36). Potential mechanisms of the IFN-I  
263 pathway, which VAMP8 may regulate, include surface expression of the IFNAR receptor or recycling  
264 of receptor components to the plasma membrane. VAMP8 has been described to regulate the  
265 surface expression of a water transport channel, aquaporin 2, in the kidney (38). Despite the reduced  
266 surface expression, the total amount of aquaporin 2 is higher in the cell, but it is retained in vesicles  
267 below the plasma membrane (38). Alternatively, VAMP8 might influence the secretion of factors or  
268 the oxidative condition of the microenvironment important to maintain IFN-I signaling. In phagocytic  
269 cells infected with *Leishmania*, VAMP8 regulates the transport of NADPH oxidase to the phagosome  
270 to facilitate optimal conditions for peptide loading into MHC class I molecules (39). Although VAMP8  
271 would not be regulating phagocytosis in this model of WNV infection, it is possible that VAMP8  
272 regulates NADPH oxidase localization affecting the oxidative environment of the infected cell and

## TRIM6 and WNV

273 consequently IFN-I signaling (51–53). TRIM6 may either directly affect VAMP8 expression or may act  
274 indirectly through a yet unidentified secondary factor. Dissecting this interaction will be important in  
275 further understanding TRIM6's regulation of the host's IFN-I pathway and uncovering VAMP8's novel  
276 role in IFN-I signaling. Our study indicates a new role for VAMP8 in the TRIM6 pathway of immune  
277 activation during viral infection (Figure 7).

278 Elucidating the interactions of the human immune system with viral infection is essential to  
279 understanding viral pathology, as well as identifying cellular targets for antiviral drug development.  
280 Our work has identified a novel IFN related host factor that is important in the regulation of WNV  
281 replication and in the life cycles of other viruses. This may provide a conserved target for the  
282 development of anti-viral strategies and for the elucidation of further conserved pathways in host-  
283 pathogen interaction.

## 284 285 **ACKNOWLEDGEMENTS**

286 Dr. Rajsbaum's lab was supported in part by the John Sealy Memorial Endowment Fund for  
287 Biomedical Research (UTMB), and NIH/NIAID grants R21 AI132479-01, R21 AI126012-01A1 and  
288 R01 AI134907-01. Dr. Freiberg's lab was supported in part by departmental funds and NIH/NIAID  
289 grants R33 AI102267.

## 290 291 292 **MATERIALS & METHODS**

293 Viruses & Cells: West Nile Virus (WNV) isolate 385-99 was obtained from the World Reference  
294 Center for Emerging Viruses & Arboviruses (UTMB, Dr. Robert Tesh). A549 and CCL-81 lines were  
295 obtained from the American Type Culture Collection. TRIM6 knockout cells were prepared as  
296 previously described (43). All lines were maintained in DMEM (Gibco), supplemented with 10% Fetal

## TRIM6 and WNV

297 Bovine Serum (Atlanta Biologicals). Infections were performed in DMEM supplemented with 2% Fetal  
298 Bovine Serum (FBS), and 1% Penicillin/Streptomycin (Gibco). For growth kinetics experiments,  
299 150,000 wt or TRIM6-KO A549 cells/well were infected with 100 $\mu$ L of WNV multiplicity of infection  
300 (Moi) 0.1 or 5.0 for 1 hour at 37°C, 5% CO<sub>2</sub> then the inoculum was removed and washed 3 times with  
301 1mL of 1X PBS. After the cells were washed, 1mL of DMEM supplemented with 2% FBS was added  
302 to each well. Supernatant (150 $\mu$ L) was collected at the designated time points for plaque assay.  
303 Plaque assays were performed in 12-well plates containing 200,000 CCL-81 cells/well. Viral samples  
304 were diluted log fold and applied to the monolayer. Following 1 hour in a humidified 37°C, 5% CO<sub>2</sub>  
305 incubator, semisolid overlay containing MEM, 2% Fetal Bovine Serum, 1% Penicillin/Streptomycin  
306 and 0.8% Tragacanth (Sigma Aldrich) was applied. Overlay was removed after 72 hours, and  
307 monolayers were fixed and stained with 10% Neutral Buffered Formalin (Thermo Fisher Scientific)  
308 and Crystal Violet (Sigma Aldrich). Plaques were enumerated by counting and graphed. All  
309 manipulations of infectious West Nile Virus were performed in Biological Safety Level 3 facilities at  
310 UTMB.

311  
312 IFN $\beta$  Treatment: Cells were treated with either 100U (wt vs TRIM6 KO) or 500U (VAMP8) of  
313 recombinant human IFN $\beta$ -1a (PBL Assay Science) for either 4 hours or 12 hours prior to WNV  
314 infection.

315  
316 RNA Isolation and qRT-PCR: At the indicated timepoint per experiment, media was removed from the  
317 cell monolayer, and 1mL Trizol Reagent (Thermo Fisher Scientific) was added. RNA was isolated  
318 using Zymo Direct-zol RNA Miniprep Kits as per manufacturer instruction with in-column DNase  
319 treatment. Isolated RNA was then reverse transcribed using the high capacity cDNA reverse  
320 transcription kit (Applied Biosystems). The cDNA was then diluted 1:3 in nuclease-free water

## TRIM6 and WNV

(Corning). Relative gene expression (primers listed in Supplementary Table 1) was determined using the iTaq™ Universal SYBR green (Bio-Rad) with the CFX384 instrument (Bio-Rad). The relative mRNA expression levels were analyzed using the CFX Manager software (Bio-Rad). The change in threshold cycle ( $\Delta$ CT) was calculated with 18S gene served as the reference mRNA for normalization.

RNA Sequencing & Analysis: A549 (wt and TRIM6KO) cells were infected at a high MOI (5.0) and RNA isolated 24 hours post infection. RNA quality was assessed by visualization of 18S and 28S RNA bands using an Agilent BioAnalyzer 2100 (Agilent Technologies, CA); the electropherograms were used to calculate the 28S/18S ratio and the RNA Integrity Number. Poly-A+ RNA was enriched from total RNA (1  $\mu$ g) using oligo dT-attached magnetic beads. First and second strand synthesis, adapter ligation and amplification of the library were performed using the Illumina TruSeq RNA Sample Preparation kit as recommended by the manufacturer (Illumina, Inc). Library quality was evaluated using an Agilent DNA-1000 chip on an Agilent 2100 Bioanalyzer. Quantification of library DNA templates was performed using qPCR and a known-size reference standard. Cluster formation of the library DNA templates was performed using the TruSeq PE Cluster Kit v3 (Illumina) and the Illumina cBot workstation using conditions recommended by the manufacturer. Paired end 50 base sequencing by synthesis was performed using TruSeq SBS kit v3 (Illumina) on an Illumina HiSeq 1500 using protocols defined by the manufacturer.

RNA-Seq Analysis: The alignment of NGS sequence reads was performed using the Spliced Transcript Alignment to a Reference (STAR) program, version 2.5.1b, using default parameters (54). We used the human hg38 assembly as a reference with the UCSC gene annotation file; both downloaded from the Illumina iGenomes website. The `-quantMode GeneCounts` option of STAR

## TRIM6 and WNV

provided read counts per gene, which were input into the DESeq2 (version 1.12.1) (55) differential expression analysis program to determine expression levels and differentially expressed genes.

siRNA Transfection: Transient knockdown of endogenous VAMP8 in wt A549 was done in 12-well plates. Briefly, 20 pmol of Smartpool ON-TARGETplus Non-targeting (D-001810-10-05) or ON-TARGETplus VAMP8 (L-013503-00-0005) siRNA (Dharmacon) were transfected with Lipofectamine RNAiMAX (Invitrogen) following the manufacturer's instructions. Cells were transfected with siRNA 24 hours prior to infection or IFN $\beta$  treatment. The efficiency of VAMP8 knockdown was monitored by qRT-PCR or western blot.

Western Blotting: Infected or IFN $\beta$ -treated cells were lysed in 2X Laemmli buffer with  $\beta$ -ME and boiled at 100°C for 10 minutes prior to removal from BSL-3. For immunoblotting, proteins were resolved using SDS-polyacrylamide gel electrophoresis (4-15% SDS-PAGE) and transferred onto methanol-activated polyvinylidene difluoride (PVDF) membrane (Bio-Rad). The following primary antibodies were used: anti-pIRF3 (S396) (1:1000) (Cell Signaling), anti-total IRF3 (1:1000) (Immuno-Biological), anti-TRIM6 N-terminus (1:1000) (Sigma), anti-actin (1:2000) (Abcam), anti-pSTAT1 (Y701) (1:1000) (Cell Signaling), anti-pSTAT1 (S708) (1:2000), anti-total STAT1 (1:1000) (BD Biosciences), anti-VAMP8 (Cell Signaling) (1:500), anti-IKK $\epsilon$  (T501) (1:1000) (Novus Biologicals), anti-IKK $\epsilon$  (S172) (1:1000), anti-total IKK $\epsilon$  (1:1000) (Abcam), anti-pTBK1 (S172) (1:1000) (Epitomics), anti-total TBK1 (1:1000) (Novus Biologicals). Immunoblots were developed with the following secondary antibodies: ECL anti-rabbit IgG horseradish peroxidase conjugated whole antibody from donkey (1:10,000), and ECL anti-mouse IgG horseradish peroxidase conjugated whole antibody from sheep (1:10,000) (GE Healthcare; Buckinghamshire, England). The proteins were visualized with either Pierce™ or SuperSignal® West Femto Luminol chemiluminescence substrates (Thermo Scientific).



## TRIM6 and WNV

368

369

Statistical Analysis: All analyses were performed in Graphpad Prism. All experiments were performed in triplicate. Statistical tests and measures of statistical significance are specified in the relevant figure legends. Repeated measures two-way ANOVA with Bonferroni's post-test was applied for kinetics two factor comparisons (kinetics experiments), one-way ANOVA with Tukey's post-test was used for comparing three more groups, and a student's t-test for comparing two groups.

374

375

## REFERENCES

376

1. Gubler D, Kuno G, Alter L. 2007. Flaviviruses, p. 1153–1252. *In* Fields Virology, 5th ed. Lippincott, Williams & Wilkins, Philadelphia, PA, USA.

377

378

2. Lindenbach B, Thiel H-J, Rice C. 2007. Flaviviridae: The Viruses and Their Replication, p. 1101–1152. *In* Fields Virology, 5th ed. Lippincott, Williams & Wilkins, Philadelphia, PA, USA.

379

380

3. West Nile Virus and Other Arboviral Diseases — United States, 2013.

381

4. Sejvar JJ. 2014. Clinical Manifestations and Outcomes of West Nile Virus Infection. *Viruses* 6:606–623.

382

5. Dayan GH, Pugachev K, Bevilacqua J, Lang J, Monath TP. 2013. Preclinical and Clinical Development of a YFV 17 D-Based Chimeric Vaccine against West Nile Virus. *Viruses* 5:3048–3070.

383

384

6. Dayan GH, Bevilacqua J, Coleman D, Buldo A, Risi G. 2012. Phase II, dose ranging study of the safety and immunogenicity of single dose West Nile vaccine in healthy adults  $\geq 50$  years of age. *Vaccine* 30:6656–

385

386

6664.

## TRIM6 and WNV

- 387 7. Tesh RB, Arroyo J, Travassos da Rosa APA, Guzman H, Xiao S-Y, Monath TP. 2002. Efficacy of Killed  
388 Virus Vaccine, Live Attenuated Chimeric Virus Vaccine, and Passive Immunization for Prevention of West  
389 Nile virus Encephalitis in Hamster Model. *Emerg Infect Dis* 8:1392–1397.
- 390 8. Blázquez AB, Vázquez-Calvo Á, Martín-Acebes MA, Saiz J-C. 2018. Pharmacological Inhibition of  
391 Protein Kinase C Reduces West Nile Virus Replication. *Viruses* 10.
- 392 9. Morrey JD, Taro BS, Siddharthan V, Wang H, Smee DF, Christensen AJ, Furuta Y. 2008. Efficacy of orally  
393 administered T-705 pyrazine analog on lethal West Nile virus infection in rodents. *Antiviral Research*  
394 80:377–379.
- 395 10. Perwitasari O, Cho H, Diamond MS, Gale M. 2011. Inhibitor of  $\kappa$ B Kinase  $\epsilon$  (IKK $\epsilon$ ), STAT1, and IFIT2  
396 Proteins Define Novel Innate Immune Effector Pathway against West Nile Virus Infection. *J Biol Chem*  
397 286:44412–44423.
- 398 11. Gorman MJ, Poddar S, Farzan M, Diamond MS. 2016. The Interferon-Stimulated Gene Ifitm3 Restricts  
399 West Nile Virus Infection and Pathogenesis. *J Virol* 90:8212–8225.
- 400 12. Mertens E, Kajaste-Rudnitski A, Torres S, Funk A, Frenkiel M-P, Itean I, Khromykh AA, Desprès P.  
401 2010. Viral determinants in the NS3 helicase and 2K peptide that promote West Nile virus resistance to  
402 antiviral action of 2',5'-oligoadenylate synthetase 1b. *Virology* 399:176–185.
- 403 13. Lazear HM, Diamond MS. 2015. New Insights into Innate Immune Restriction of West Nile Virus  
404 Infection. *Curr Opin Virol* 11:1–6.
- 405 14. Daffis S, Lazear HM, Liu WJ, Audsley M, Engle M, Khromykh AA, Diamond MS. 2011. The Naturally  
406 Attenuated Kunjin Strain of West Nile Virus Shows Enhanced Sensitivity to the Host Type I Interferon  
407 Response. *J Virol* 85:5664–5668.

## TRIM6 and WNV

- 408 15. Daffis S, Samuel MA, Suthar MS, Gale M, Diamond MS. 2008. Toll-Like Receptor 3 Has a Protective Role  
409 against West Nile Virus Infection. *J Virol* 82:10349–10358.
- 410 16. Errett JS, Suthar MS, McMillan A, Diamond MS, Gale M. 2013. The Essential, Nonredundant Roles of  
411 RIG-I and MDA5 in Detecting and Controlling West Nile Virus Infection. *J Virol* 87:11416–11425.
- 412 17. Lazear HM, Pinto AK, Vogt MR, Gale M, Diamond MS. 2011. Beta Interferon Controls West Nile Virus  
413 Infection and Pathogenesis in Mice. *J Virol* 85:7186–7194.
- 414 18. Larena M, Lobigs M. 2017. Partial dysfunction of STAT1 profoundly reduces host resistance to flaviviral  
415 infection. *Virology* 506:1–6.
- 416 19. Suthar MS, Diamond MS, Jr MG. 2013. West Nile virus infection and immunity. *Nature Reviews*  
417 *Microbiology* 11:115–128.
- 418 20. Petersen LR, Brault AC, Nasci RS. 2013. West Nile Virus: Review of the Literature. *JAMA* 310:308–315.
- 419 21. Zhang H-L, Ye H-Q, Liu S-Q, Deng C-L, Li X-D, Shi P-Y, Zhang B. 2017. West Nile Virus NS1  
420 Antagonizes Interferon Beta Production by Targeting RIG-I and MDA5. *J Virol* 91.
- 421 22. Lubick KJ, Robertson SJ, McNally KL, Freedman BA, Rasmussen AL, Taylor RT, Walts AD, Tsuruda S,  
422 Sakai M, Ishizuka M, Boer EF, Foster EC, Chiramel AI, Addison CB, Green R, Kastner DL, Katze MG,  
423 Holland SM, Forlino A, Freeman AF, Boehm M, Yoshii K, Best SM. 2015. Flavivirus Antagonism of Type  
424 I Interferon Signaling Reveals Prolidase as a Regulator of IFNAR1 Surface Expression. *Cell Host &*  
425 *Microbe* 18:61–74.
- 426 23. Laurent-Rolle M, Boer EF, Lubick KJ, Wolfenbarger JB, Carmody AB, Rockx B, Liu W, Ashour J, Shupert  
427 WL, Holbrook MR, Barrett AD, Mason PW, Bloom ME, García-Sastre A, Khromykh AA, Best SM. 2010.

## TRIM6 and WNV

- 428 The NS5 Protein of the Virulent West Nile Virus NY99 Strain Is a Potent Antagonist of Type I Interferon-  
429 Mediated JAK-STAT Signaling. *J Virol* 84:3503–3515.
- 430 24. Schuessler A, Funk A, Lazear HM, Cooper DA, Torres S, Daffis S, Jha BK, Kumagai Y, Takeuchi O,  
431 Hertzog P, Silverman R, Akira S, Barton DJ, Diamond MS, Khromykh AA. 2012. West Nile Virus  
432 Noncoding Subgenomic RNA Contributes to Viral Evasion of the Type I Interferon-Mediated Antiviral  
433 Response. *J Virol* 86:5708–5718.
- 434 25. Keller BC, Fredericksen BL, Samuel MA, Mock RE, Mason PW, Diamond MS, Gale M. 2006. Resistance  
435 to Alpha/Beta Interferon Is a Determinant of West Nile Virus Replication Fitness and Virulence. *J Virol*  
436 80:9424–9434.
- 437 26. Sharma S, tenOever BR, Grandvaux N, Zhou G-P, Lin R, Hiscott J. 2003. Triggering the Interferon  
438 Antiviral Response Through an IKK-Related Pathway. *Science* 300:1148–1151.
- 439 27. Paul A, Tang TH, Ng SK. 2018. Interferon Regulatory Factor 9 Structure and Regulation. *Front Immunol* 9.
- 440 28. Fu XY, Kessler DS, Veals SA, Levy DE, Darnell JE. 1990. ISGF3, the transcriptional activator induced by  
441 interferon alpha, consists of multiple interacting polypeptide chains. *Proc Natl Acad Sci U S A* 87:8555–  
442 8559.
- 443 29. tenOever BR, Ng S-L, Chua MA, McWhirter SM, García-Sastre A, Maniatis T. 2007. Multiple Functions of  
444 the IKK-Related Kinase IKK $\epsilon$  in Interferon-Mediated Antiviral Immunity. *Science* 315:1274–1278.
- 445 30. Rajsbaum R, Versteeg GA, Schmid S, Maestre AM, Belicha-Villanueva A, Martínez-Romero C, Patel JR,  
446 Morrison J, Pisanelli G, Miorin L, Laurent-Rolle M, Moulton HM, Stein DA, Fernandez-Sesma A,  
447 tenOever BR, García-Sastre A. 2014. Unanchored K48-Linked Polyubiquitin Synthesized by the E3-

## TRIM6 and WNV

- 448 Ubiquitin Ligase TRIM6 Stimulates the Interferon-IKK $\epsilon$  Kinase-Mediated Antiviral Response. *Immunity*  
449 40:880–895.
- 450 31. Antonin W, Holroyd C, Tikkanen R, Höning S, Jahn R, Pfeffer SR. 2000. The R-SNARE  
451 Endobrevin/VAMP-8 Mediates Homotypic Fusion of Early Endosomes and Late Endosomes. *MBoC*  
452 11:3289–3298.
- 453 32. Wang C-C, Ng CP, Lu L, Atlashkin V, Zhang W, Seet L-F, Hong W. 2004. A Role of VAMP8/Endobrevin  
454 in Regulated Exocytosis of Pancreatic Acinar Cells. *Developmental Cell* 7:359–371.
- 455 33. Wang C-C, Shi H, Guo K, Ng CP, Li J, Qi Gan B, Chien Liew H, Leinonen J, Rajaniemi H, Hong Zhou Z,  
456 Zeng Q, Hong W, Malhotra V. 2007. VAMP8/Endobrevin as a General Vesicular SNARE for Regulated  
457 Exocytosis of the Exocrine System. *MBoC* 18:1056–1063.
- 458 34. Behrendorff N, Dolai S, Hong W, Gaisano HY, Thorn P. 2011. Vesicle-associated Membrane Protein 8  
459 (VAMP8) Is a SNARE (Soluble N-Ethylmaleimide-sensitive Factor Attachment Protein Receptor)  
460 Selectively Required for Sequential Granule-to-granule Fusion. *J Biol Chem* 286:29627–29634.
- 461 35. Jones LC, Moussa L, Fulcher ML, Zhu Y, Hudson EJ, O’Neal WK, Randell SH, Lazarowski ER, Boucher  
462 RC, Kreda SM. 2012. VAMP8 is a vesicle SNARE that regulates mucin secretion in airway goblet cells. *J*  
463 *Physiol* 590:545–562.
- 464 36. Loo LS, Hwang L-A, Ong YM, Tay HS, Wang C-C, Hong W. A role for endobrevin/VAMP8 in CTL lytic  
465 granule exocytosis. *European Journal of Immunology* 39:3520–3528.
- 466 37. Kanwar N, Fayyazi A, Backofen B, Nitsche M, Dressel R, Fischer von Mollard G. 2008. Thymic alterations  
467 in mice deficient for the SNARE protein VAMP8/endobrevin. *Cell Tissue Res* 334:227–242.

## TRIM6 and WNV

- 468 38. Wang C-C, Ng CP, Shi H, Liew HC, Guo K, Zeng Q, Hong W. 2010. A Role for VAMP8/Endobrevin in  
469 Surface Deployment of the Water Channel Aquaporin 2. *Mol Cell Biol* 30:333–343.
- 470 39. Matheoud D, Moradin N, Bellemare-Pelletier A, Shio MT, Hong WJ, Olivier M, Gagnon É, Desjardins M,  
471 Descoteaux A. 2013. Leishmania Evades Host Immunity by Inhibiting Antigen Cross-Presentation through  
472 Direct Cleavage of the SNARE VAMP8. *Cell Host & Microbe* 14:15–25.
- 473 40. Ng S-L, Friedman BA, Schmid S, Gertz J, Myers RM, tenOever BR, Maniatis T. 2011. I $\kappa$ B kinase  $\epsilon$  (IKK $\epsilon$ )  
474 regulates the balance between type I and type II interferon responses. *PNAS* 108:21170–21175.
- 475 41. Jiang D, Weidner JM, Qing M, Pan X-B, Guo H, Xu C, Zhang X, Birk A, Chang J, Shi P-Y, Block TM,  
476 Guo J-T. 2010. Identification of Five Interferon-Induced Cellular Proteins That Inhibit West Nile Virus and  
477 Dengue Virus Infections. *J Virol* 84:8332–8341.
- 478 42. Danial-Farran N, Eghbaria S, Schwartz N, Kra-Oz Z, Bisharat N. 2015. Genetic variants associated with  
479 susceptibility of Ashkenazi Jews to West Nile virus infection. *Epidemiology & Infection* 143:857–863.
- 480 43. Bharaj P, Atkins C, Luthra P, Giraldo MI, Dawes BE, Miorin L, Johnson JR, Krogan NJ, Basler CF,  
481 Freiberg AN, Rajsbaum R. 2017. The Host E3-Ubiquitin Ligase TRIM6 Ubiquitinates the Ebola Virus  
482 VP35 Protein and Promotes Virus Replication. *J Virol* 91:e00833-17.
- 483 44. Bharaj P, Wang YE, Dawes BE, Yun TE, Park A, Yen B, Basler CF, Freiberg AN, Lee B, Rajsbaum R.  
484 2016. The Matrix Protein of Nipah Virus Targets the E3-Ubiquitin Ligase TRIM6 to Inhibit the IKK $\epsilon$   
485 Kinase-Mediated Type-I IFN Antiviral Response. *PLOS Pathogens* 12:e1005880.
- 486 45. Uchil PD, Hinz A, Siegel S, Coenen-Stass A, Pertel T, Luban J, Mothes W. 2013. TRIM Protein-Mediated  
487 Regulation of Inflammatory and Innate Immune Signaling and Its Association with Antiretroviral Activity.  
488 *J Virol* 87:257–272.

## TRIM6 and WNV

- 489 46. van Tol S, Hage A, Giraldo MI, Bharaj P, Rajsbaum R. 2017. The TRIMendous Role of TRIMs in Virus–  
490 Host Interactions. *Vaccines* 5:23.
- 491 47. Versteeg GA, Benke S, García-Sastre A, Rajsbaum R. 2014. InTRIMsic immunity: Positive and negative  
492 regulation of immune signaling by tripartite motif proteins. *Cytokine Growth Factor Rev* 25:563–576.
- 493 48. Versteeg GA, Rajsbaum R, Sánchez-Aparicio MT, Maestre AM, Valdiviezo J, Shi M, Inn K-S, Fernandez-  
494 Sesma A, Jung J, García-Sastre A. 2013. The E3-ligase TRIM family of proteins regulates signaling  
495 pathways triggered by innate immune pattern-recognition receptors. *Immunity* 38:384–398.
- 496 49. Daffis S, Szretter KJ, Schriewer J, Li J, Youn S, Errett J, Lin T-Y, Schneller S, Zust R, Dong H, Thiel V,  
497 Sen GC, Fensterl V, Klimstra WB, Pierson TC, Buller RM, Jr MG, Shi P-Y, Diamond MS. 2010. 2'-O  
498 methylation of the viral mRNA cap evades host restriction by IFIT family members. *Nature* 468:452–456.
- 499 50. Zhang L-K, Chai F, Li H-Y, Xiao G, Guo L. 2013. Identification of Host Proteins Involved in Japanese  
500 Encephalitis Virus Infection by Quantitative Proteomics Analysis. *J Proteome Res* 12:2666–2678.
- 501 51. Olofsson P, Nerstedt A, Hultqvist M, Nilsson EC, Andersson S, Bergelin A, Holmdahl R. 2007. Arthritis  
502 suppression by NADPH activation operates through an interferon- $\beta$  pathway. *BMC Biol* 5:19.
- 503 52. Quiroga AD, Alvarez M de L, Parody JP, Ronco MT, Francés DE, Pisani GB, Carnovale CE, Carrillo MC.  
504 2007. Involvement of reactive oxygen species on the apoptotic mechanism induced by IFN- $\alpha$ 2b in rat  
505 preneoplastic liver. *Biochemical Pharmacology* 73:1776–1785.
- 506 53. Fink K, Martin L, Mukawera E, Chartier S, De Deken X, Brochiero E, Miot F, Grandvaux N. 2013.  
507 IFN $\beta$ /TNF $\alpha$  synergism induces a non-canonical STAT2/IRF9-dependent pathway triggering a novel  
508 DUOX2 NADPH Oxidase-mediated airway antiviral response. *Cell Res* 23:673–690.

## TRIM6 and WNV

509 54. Dobin A, Davis CA, Schlesinger F, Drenkow J, Zaleski C, Jha S, Batut P, Chaisson M, Gingeras TR. 2013.  
510 STAR: ultrafast universal RNA-seq aligner. *Bioinformatics* 29:15–21.

511 55. Love MI, Huber W, Anders S. 2014. Moderated estimation of fold change and dispersion for RNA-seq data  
512 with DESeq2. *Genome Biol* 15.

513

514



## TRIM6 and WNV

### 515 **FIGURE LEGENDS**

516 **Figure 1. Increased WNV Replication in TRIM6-KO Cells is Associated with Impaired IFN-I**  
517 **Induction and Signaling.** Growth kinetics for WNV 385-99 (Mol 0.1) in wildtype (wt) and TRIM6-KO  
518 A549 cells. Viral load in cell culture supernatants of infected cells was determined by plaque assay on  
519 Vero CCL-81 cells (A). Expression levels of total and phosphorylated proteins in whole cell lysates  
520 from WNV 385-99 infected cells (Mol 0.1) were analyzed by western blot (B). mRNA expression  
521 profile of *Ifnb*, or ISGs: *Isg54*, *Oas1*, *Irf7* and *Stat1*, and or inflammatory *Il6* genes from WNV 385-99  
522 infected cells (Mol 5.0) (C). Change in expression represented as fold induction over mock infected  
523 cells, and normalized by 18s (C). Error bars represent standard deviation. For statistical analysis,  
524 two-way ANOVA with Bonferroni's post-test for multiple comparisons (A and C) was used; \*\*\*\*p  
525 <0.0001, \*\*\*p <0.001, \*\*p <0.01, \*p <0.05. All experiments were performed in triplicate and repeated  
526 three times.

527  
528 **Figure 2. IFN-I Pre-treatment is Less Efficiently Antagonizes WNV Replication in TRIM6-KO**  
529 **Cells.** wt or TRIM6-KO cells were treated with recombinant human IFN $\beta$ -1a (100U) for 4 hours prior  
530 to infection with WNV 385-99 (Mol 5.0) for 24 hours. Supernatants from infected cells were titrated  
531 and viral load was calculated via plaque assay. Error bars represent standard deviation. One-way  
532 ANOVA with Tukey's post-test was performed to assess statistical significance; \*\*\*\*p <0.0001, \*p  
533 <0.05. Fold change reported in parenthesis. All experiments were performed in triplicate.

534  
535 **Figure 3. Transcription of Canonical Interferon-Stimulated Genes and VAMP8 are Down-**  
536 **Regulated in TRIM6 Knockout Cells.** Transcriptional profiling of cellular mRNA by Next Generation  
537 Sequencing of mock (A) or WNV 385-99 infected (Mol 5.0) (B) wt or TRIM6 KO A549 at 24 hours  
538 post-infection. Log<sub>2</sub> fold change was calculated as TRIM6-KO/mock with genes down-regulated in

## TRIM6 and WNV

539 TRIM6-KO cells on the left (negative values) and up-regulated in TRIM6-KO cells on the right  
540 (positive values). The  $-\log_{10}$  p-value represents the significance. VAMP8 data point is represented as  
541 a light grey square and interferon-simulated genes (ISGs) are represented as dark grey triangles.  
542 ISGs in A: *Oasl* and *Trim31* and B: *Hla-dma*, *Hla-dmb*, *Ifi27*, *Ifitm1*, *Ifitm2*, *Ifitm3*, *Ifi30*, *Ifi35*, *Ifi44l*,  
543 *Mx2*, *Oas2*, *Trim14*, *Pml/Trim19*, *Trim31*, *Trim34*, *Zbp1*. Validation of VAMP8 expression at the  
544 protein (C) or RNA (D) levels in wt or TRIM6 KO cells. Error bars represent standard deviation and  
545 VAMP8 expression validation experiments were performed in triplicate and repeated three times.

546

547 **Figure 4. Depletion of VAMP8 Impairs STAT1 Activation during WNV Infection but does not**  
548 **alter WNV Replication.** WNV 385-99 (Mol 0.1) growth kinetics in wt A549 cells treated with non-  
549 targeting control (control) or VAMP8-targeting (VAMP8) siRNAs for 24 hours prior to infection. Viral  
550 load in cell culture supernatants of infected cells was determined by plaque assay on Vero CCL-81  
551 cells (A). Expression levels of total and phosphorylated proteins in whole cell lysates from WNV 385-  
552 99 infected cells (Mol 0.1) were analyzed by western blot (B). Error bars represent standard  
553 deviation. A two-way ANOVA with Bonferroni's post-test was applied to assess differences in viral  
554 load (A), but there were not significant differences between control and VAMP8 siRNA treated cells.  
555 Experiment performed in triplicate and repeated three times.

556

557 **Figure 5. VAMP8 Knockdown Inhibits IFN-I Signaling following IFN $\beta$  Treatment.** Translational  
558 expression levels of total and phosphorylated STAT1 in wt A549 cells following treatment with non-  
559 targeting control (siControl) or VAMP8-targeting (siVAMP8) siRNAs for 24 hours followed by  
560 treatment with recombinant human IFN $\beta$ -1a (500U/mL) for 12 hours (A). Transcriptional expression  
561 levels of *Isg54*, *Oas1*, and *Stat1* genes analyzed by qRT-PCR. Data were normalized to 18s (B).  
562 Gene expression data were analyzed using one-way ANOVA with Tukey's post-test to assess

## TRIM6 and WNV

563 statistical significance;  $p^{****} < 0.0001$ ,  $p^{***} < 0.001$ ,  $p^* < 0.05$ . Experiments performed in triplicate and  
564 repeated three times.

565  
566 **Figure 6. WNV Replication is Enhanced in VAMP8 Knockdown Cells Following Pre-treatment**  
567 **with IFN $\beta$ .** wt A549 cells were treated with non-targeting control (control) or VAMP8-targeting  
568 (VAMP8) siRNAs for 24 hours then treated with recombinant human IFN $\beta$ -1a for 16 hours prior to  
569 infection with WNV 385-99 (Mol 5.0) for 24 hours. Supernatants from infected cells were titrated and  
570 viral load was calculated via plaque assay. Error bars represent standard deviation. One-way ANOVA  
571 with Tukey's post-test was performed to assess statistical significance;  $****p < 0.0001$ ,  $*p < 0.05$ . Fold  
572 change reported in parenthesis. Experiment completed in triplicate.

## 573 574 **Figure 7. Graphical Summary.**

575 Following virus infection, viral RNA is recognized by pathogen recognition receptors (PRRs). PRRs  
576 then signal through their adaptors, triggering the activation of kinases TBK1 and IKK $\epsilon$ , which  
577 phosphorylate and activate the transcription factor IRF3. Once activated, IRF3 translocates to the  
578 nucleus and, in concert with other factors not indicated, promotes the transcription of IFN $\beta$ . IFN $\beta$  is  
579 then secreted and signals in an autocrine or paracrine manner through the type I IFN receptor  
580 (IFNAR). The kinases (Jak1 and Tyk2) associated with IFNAR then facilitate the phosphorylation of  
581 STAT1 at tyrosine (Y) 701 and STAT2 in an IKK $\epsilon$ -independent manner. Phosphorylated STAT1 and  
582 STAT2 interact with IRF9 to form the ISGF3 complex, which translocates to the nucleus to promote  
583 the transcription of genes with interferon stimulated response elements (ISRE) including *Stat1*, *Oas1*,  
584 and *Isg54*. In addition to IKK $\epsilon$  independent IFN-I signaling, the E3 ubiquitin ligase TRIM6 facilitates  
585 IKK $\epsilon$ -dependent IFN-I signaling. TRIM6, in coordination with the ubiquitin activating (UbE1) and  
586 ligating (UbE2K) enzymes to facilitate the formation of K48-linked unanchored poly-ubiquitin chains,

## TRIM6 and WNV

587 which act as a scaffold for the oligomerization and cross-phosphorylation of IKK $\epsilon$  at threonine (T)  
588 501(30). TRIM6 also facilitates activation of IKK $\epsilon$  during IFN-I induction. During IFN-I signaling,  
589 activated IKK $\epsilon$  phosphorylates STAT1 at serine (S) 708. STAT1 phosphorylation at S708, an IKK $\epsilon$ -  
590 dependent modification, facilitates the formation of an ISGF3 complex with different biophysiological  
591 properties which allows the ISGF3 complex to have enhanced binding to certain ISRE-containing  
592 promoters ultimately inducing a different ISG profile than when STAT1 is phosphorylated at Y701 (29,  
593 40). Although the mechanism is currently unknown (question mark), TRIM6 induces VAMP8  
594 expression, which in turn is important for inducing optimal IFN-I signaling modulating STAT1  
595 phosphorylation at Y701, and an efficient antiviral response.

## 596

### 597 **Table S1. qRT-PCR primers**

598  
599  
600  
601

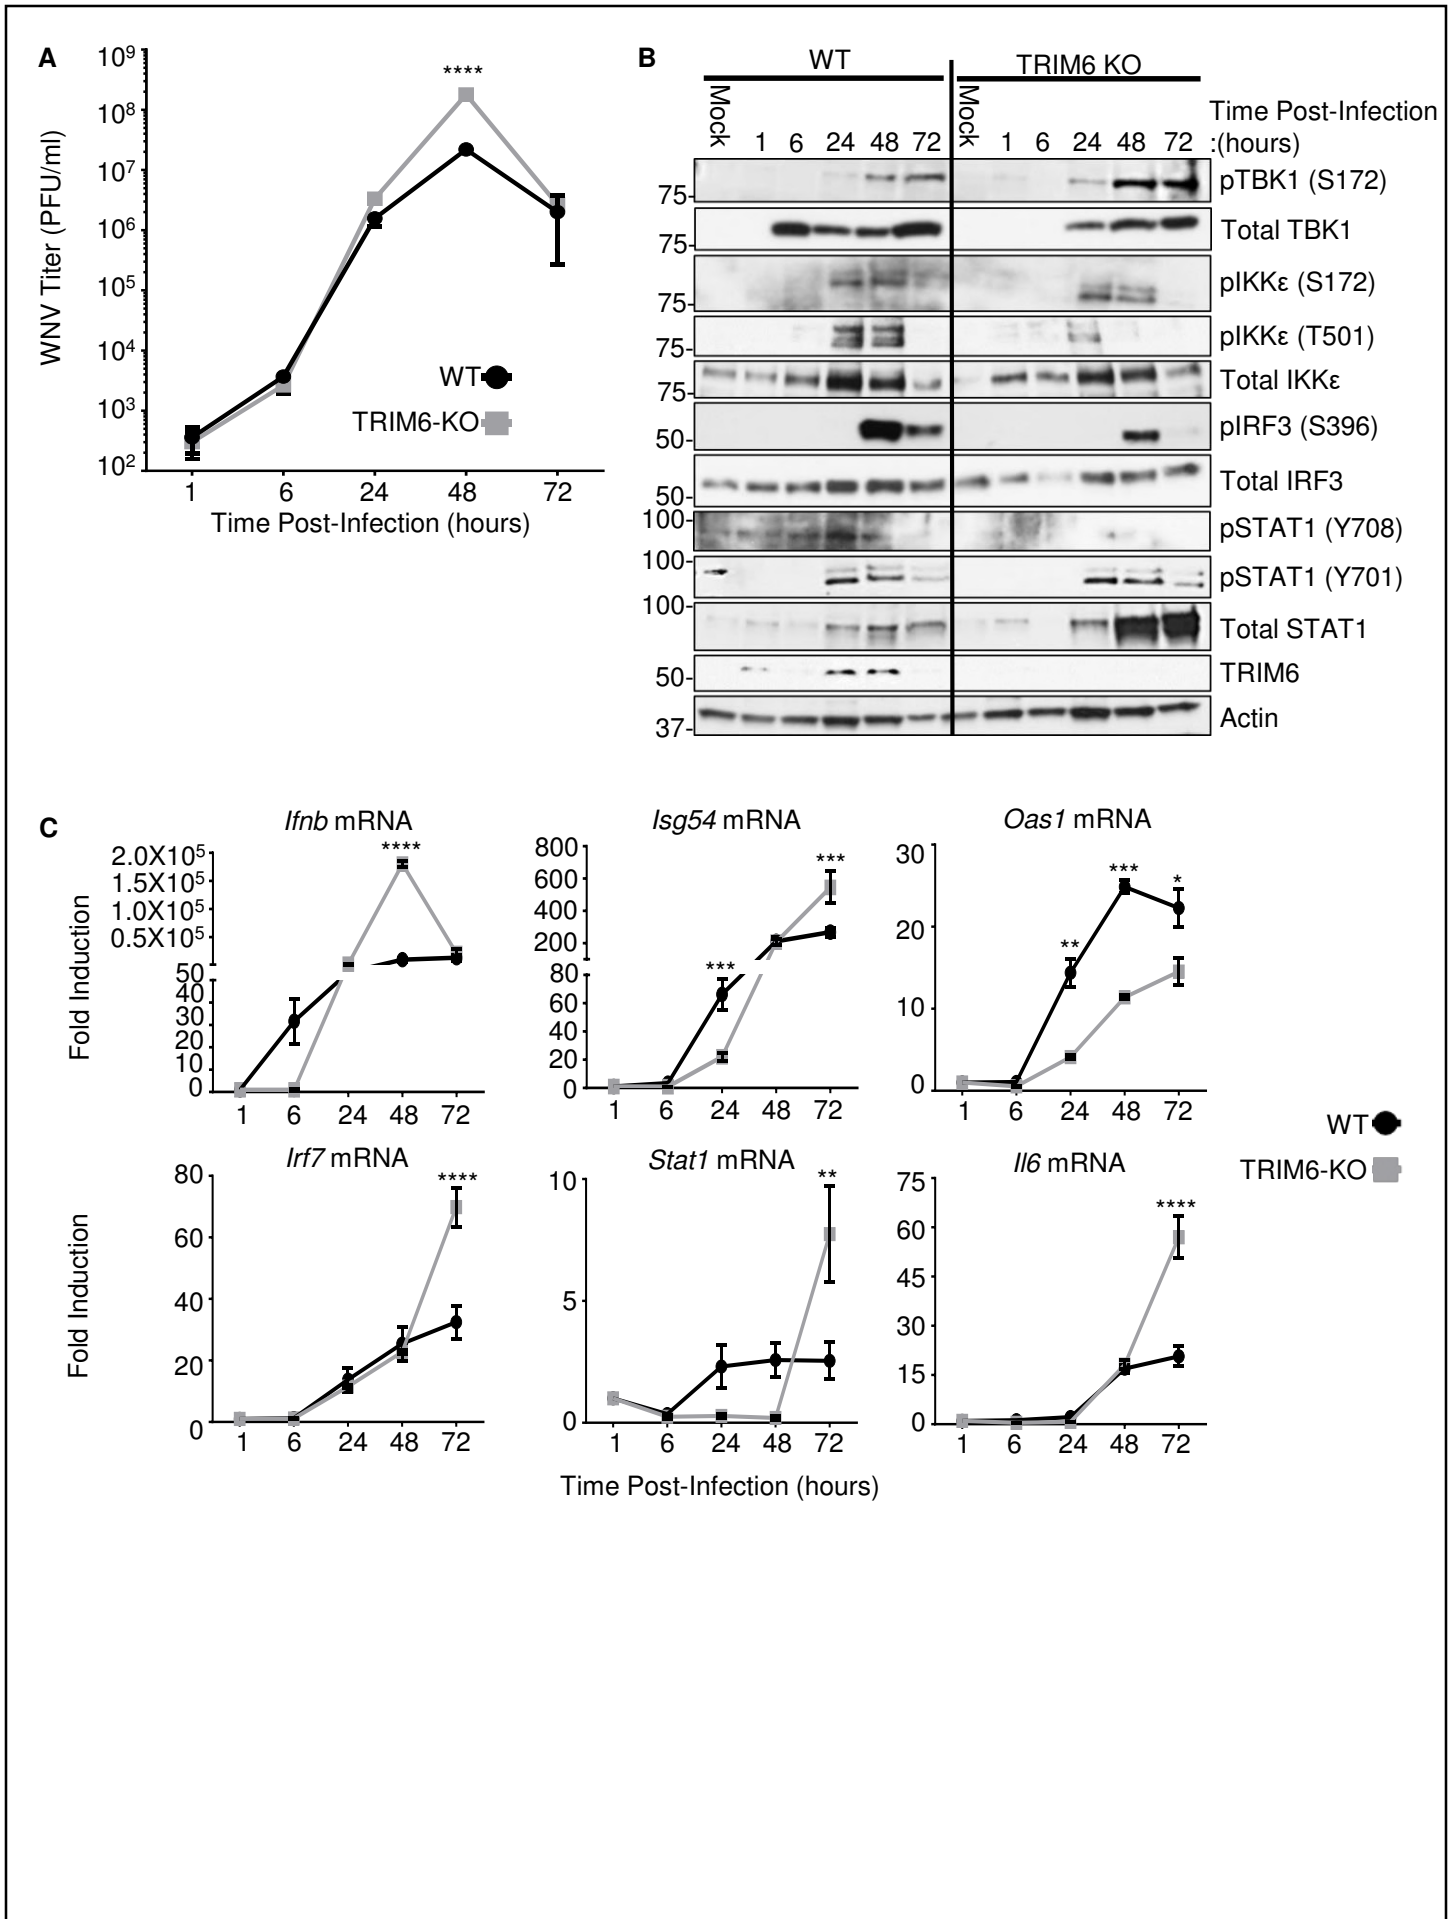

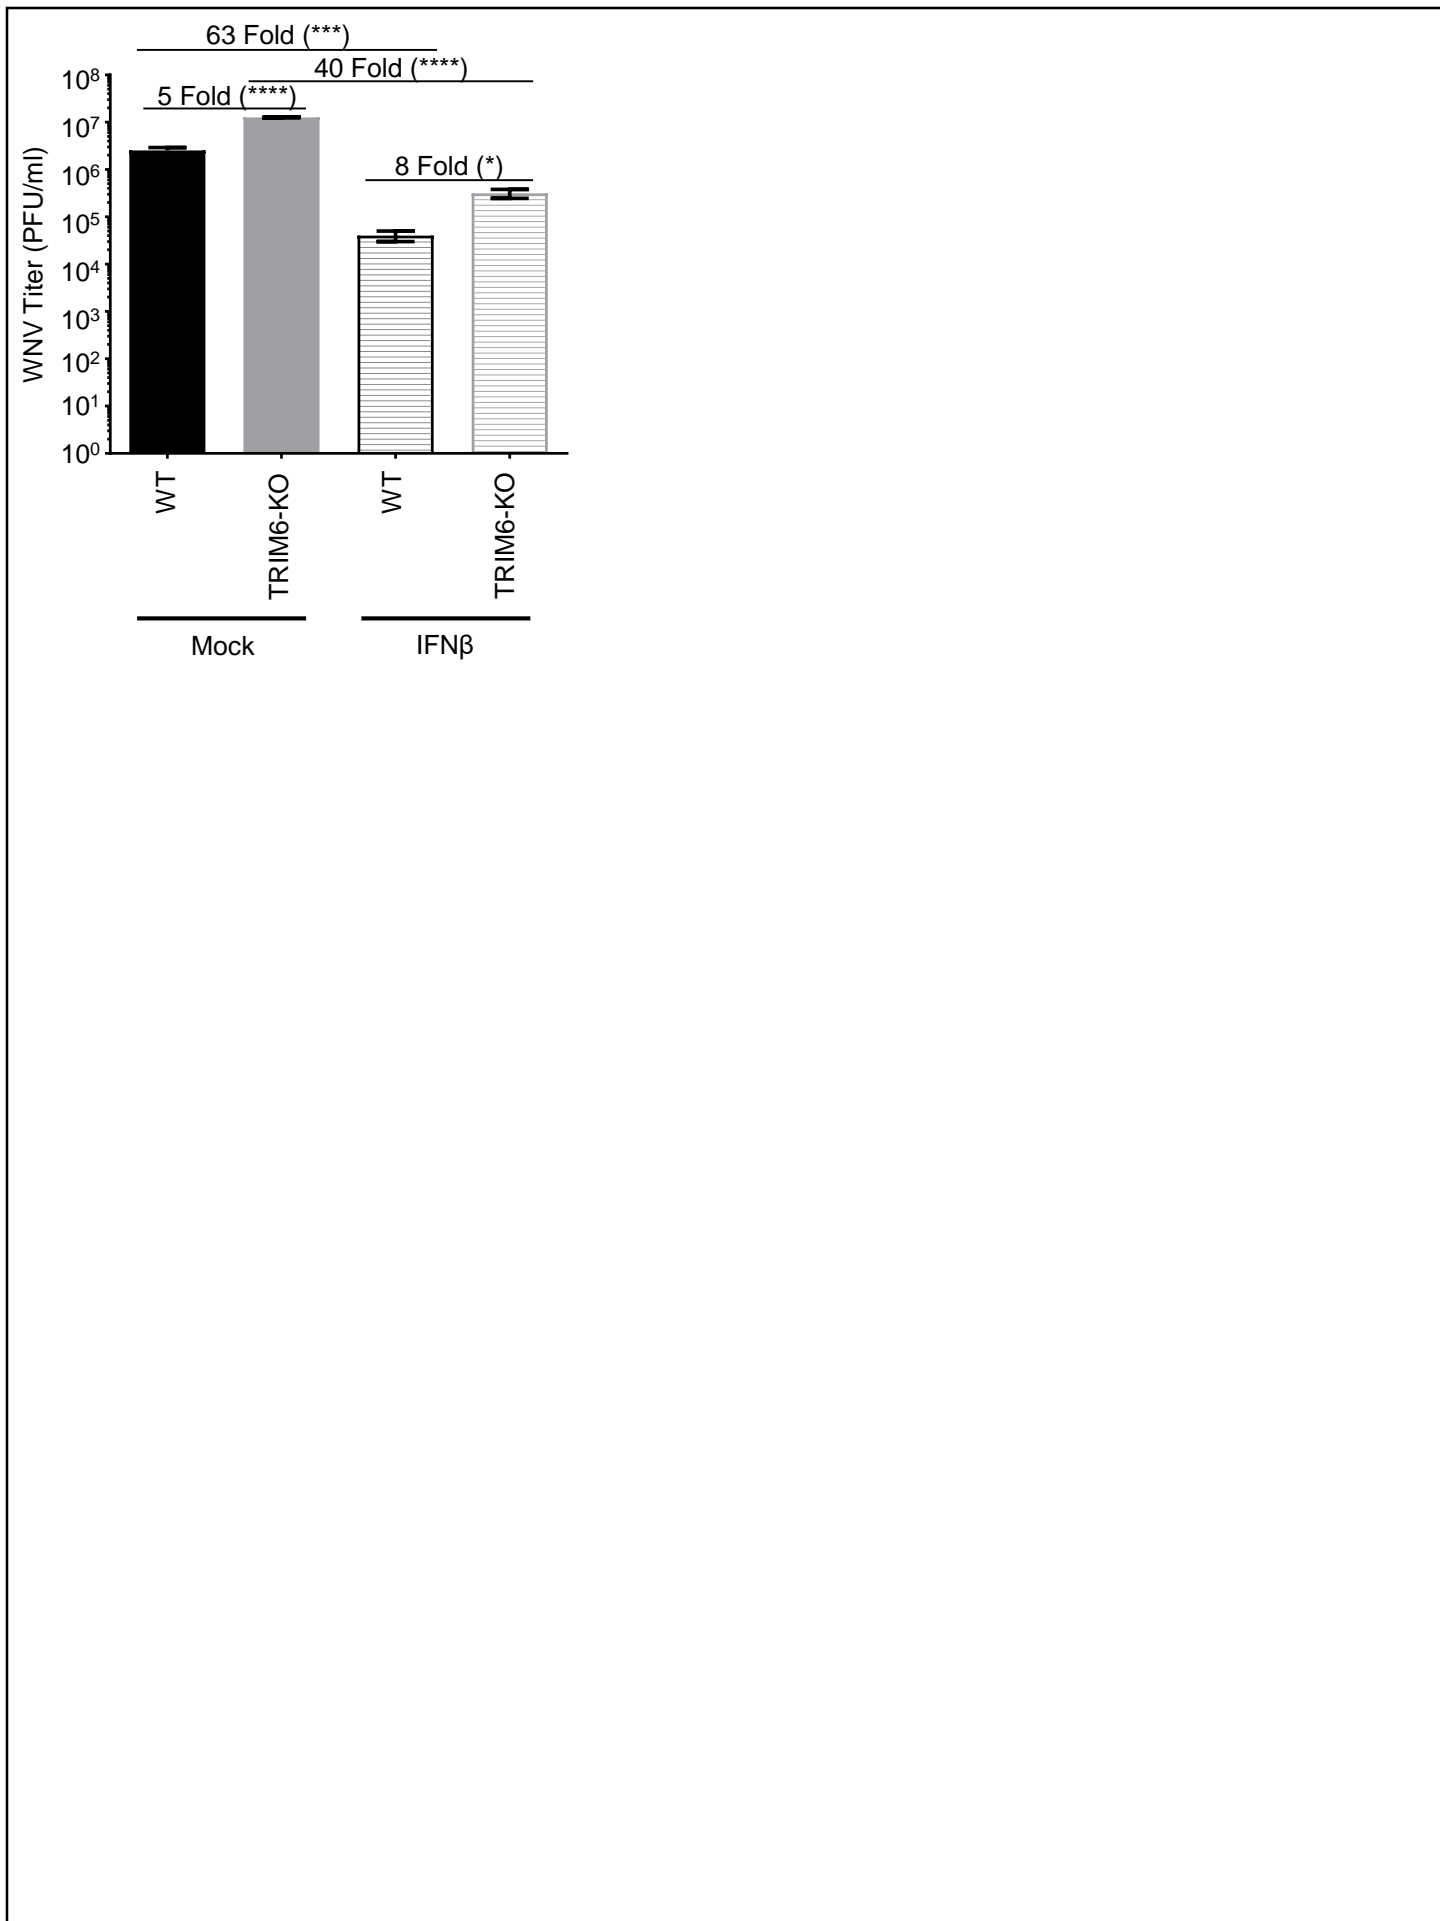

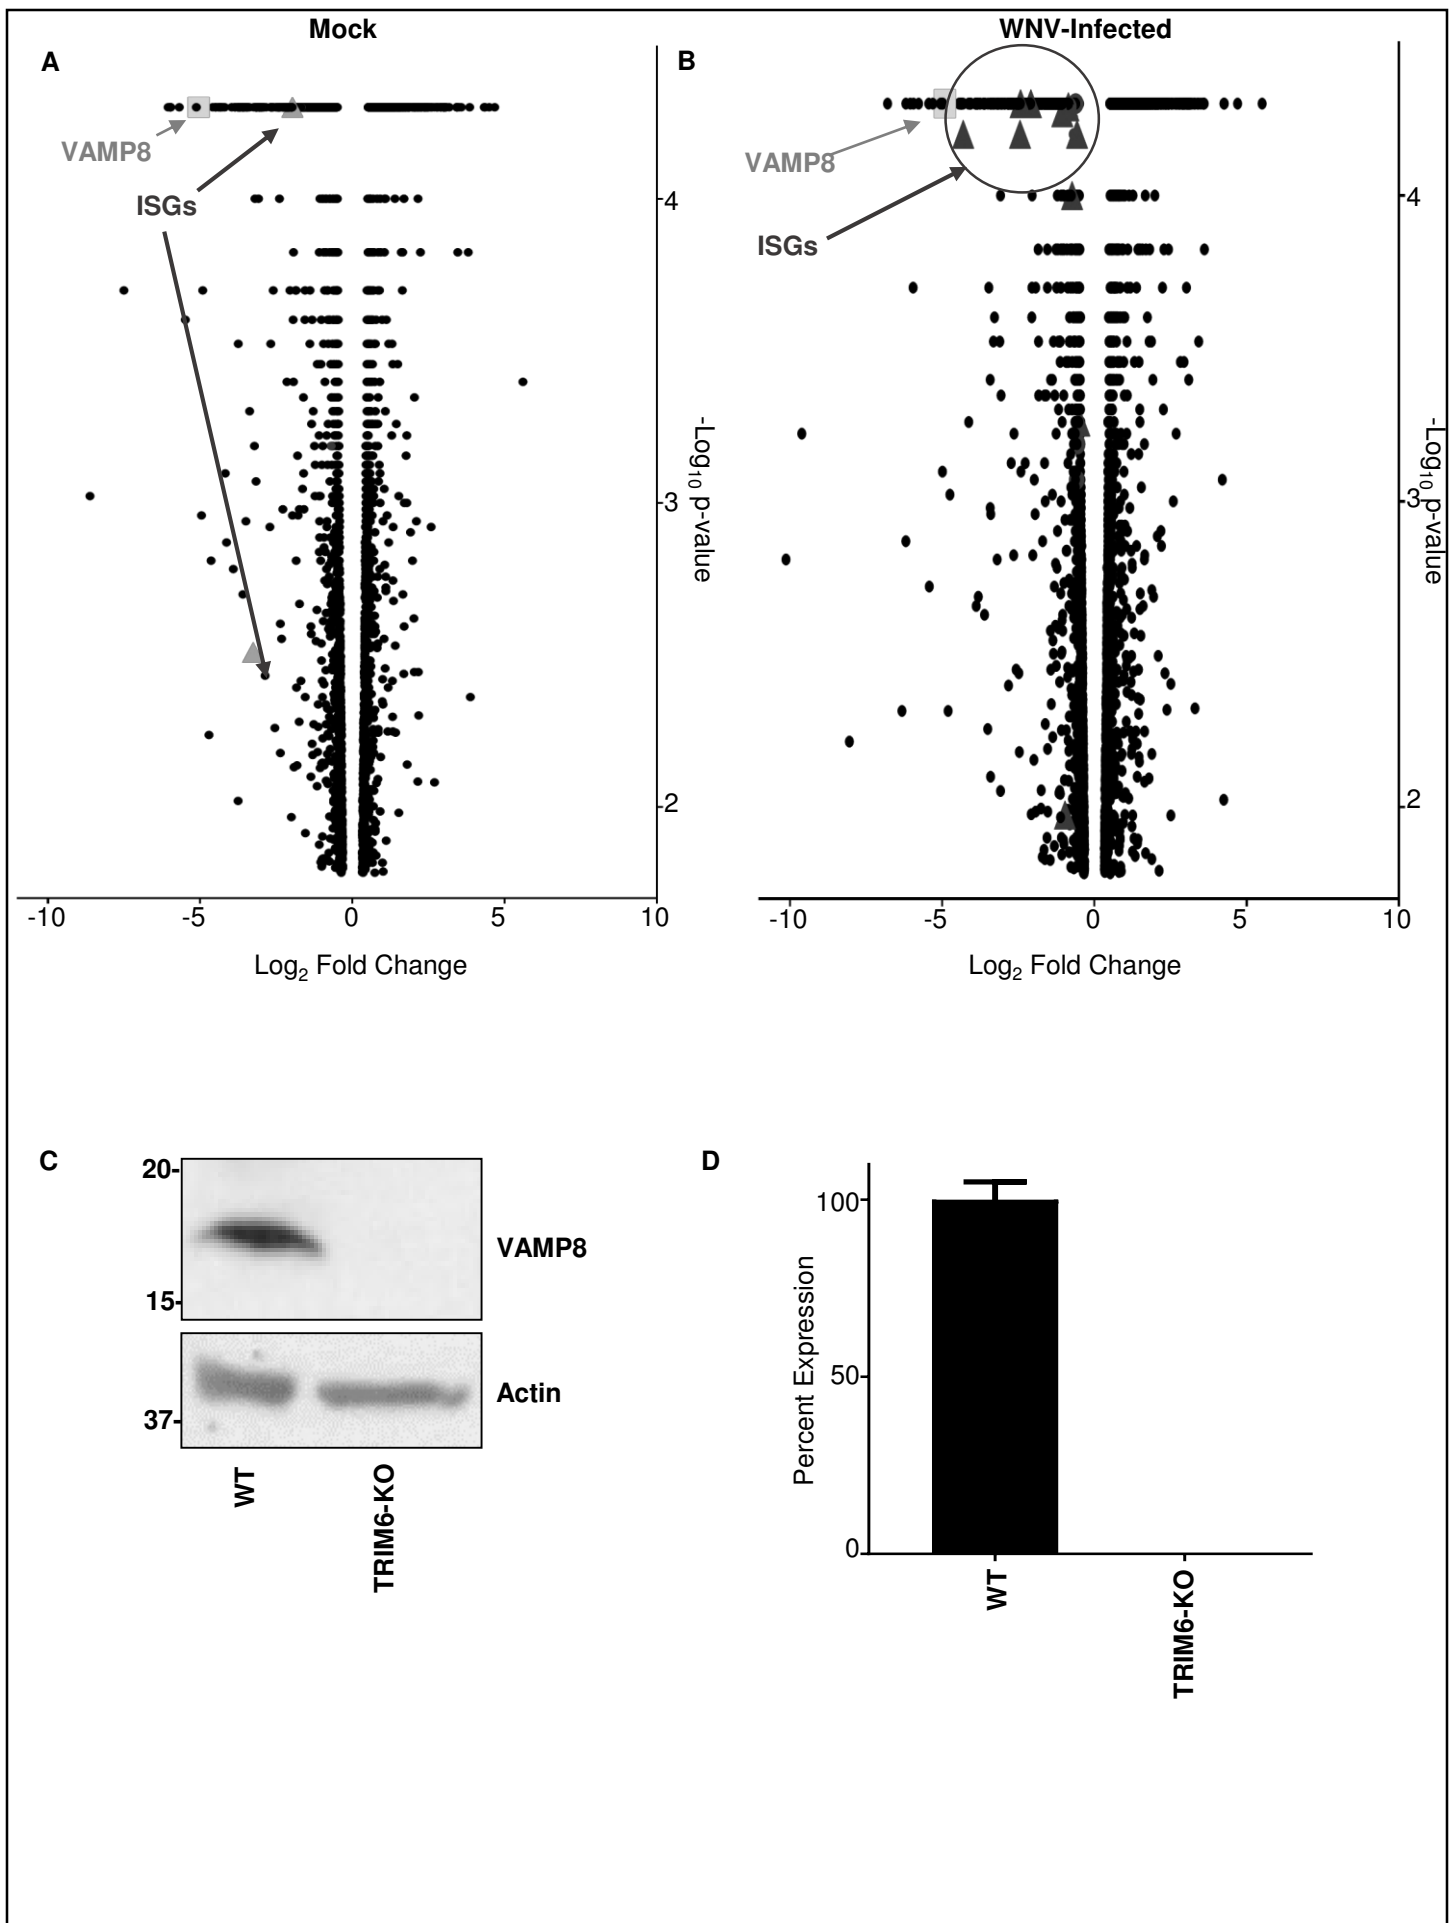

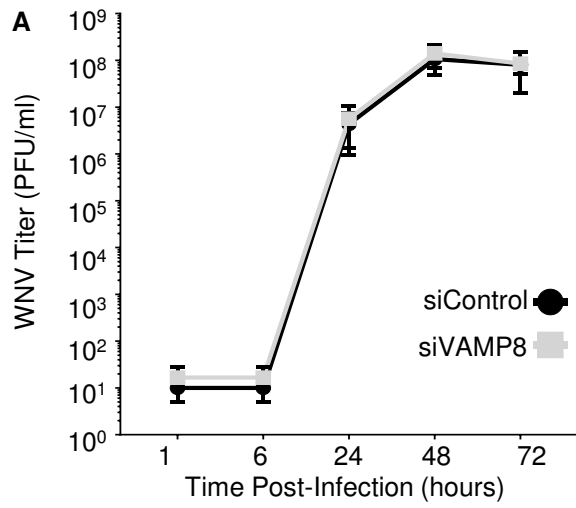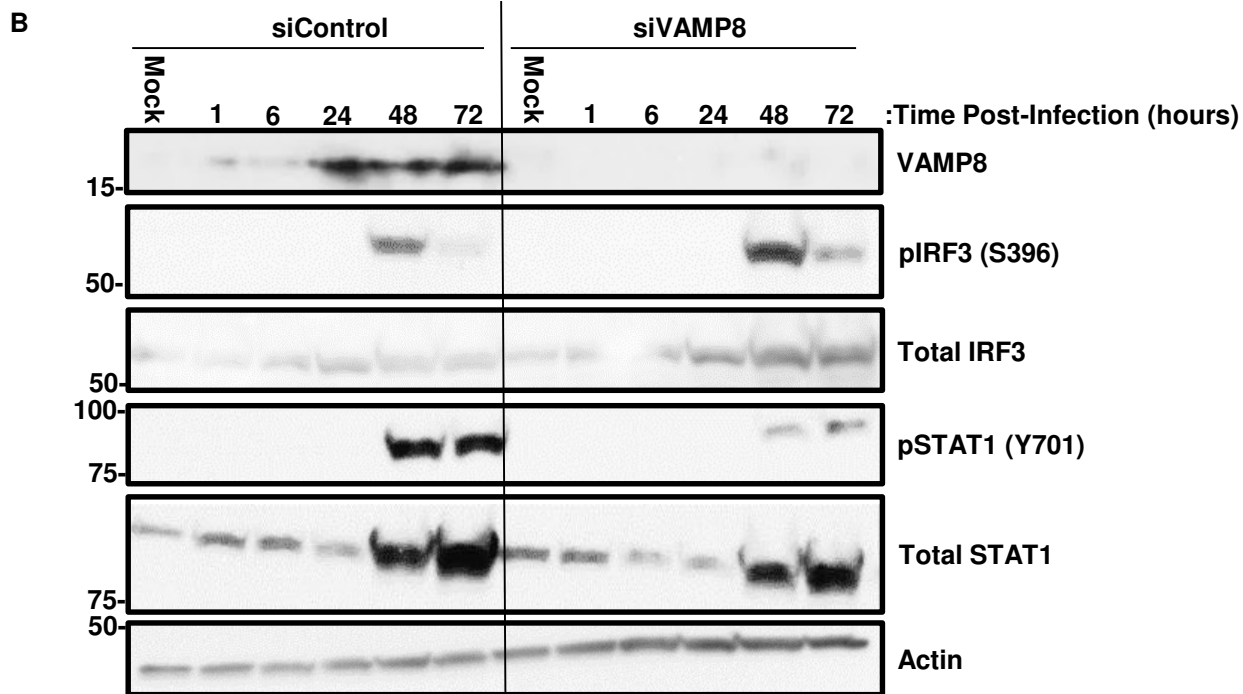



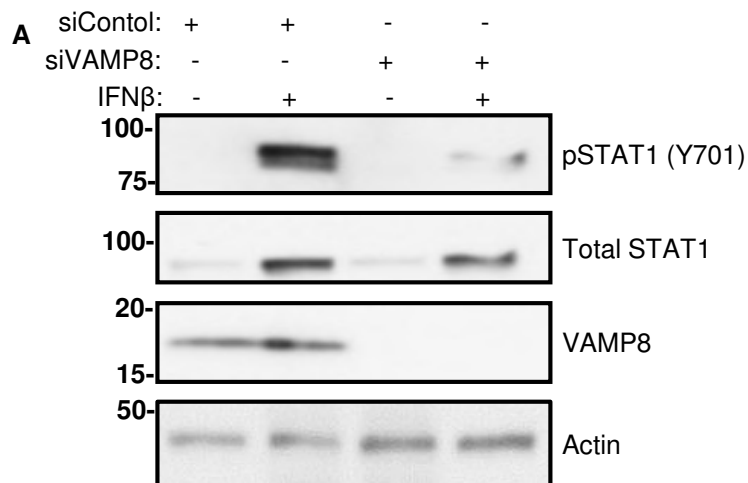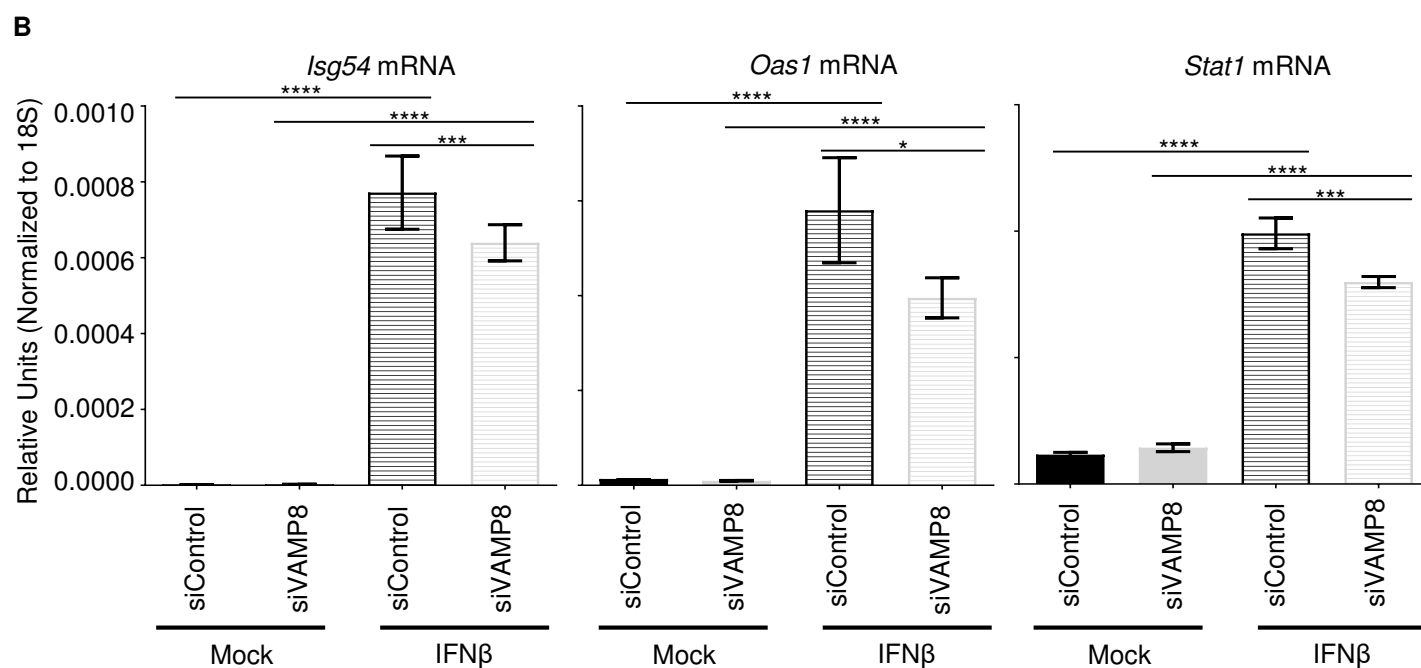

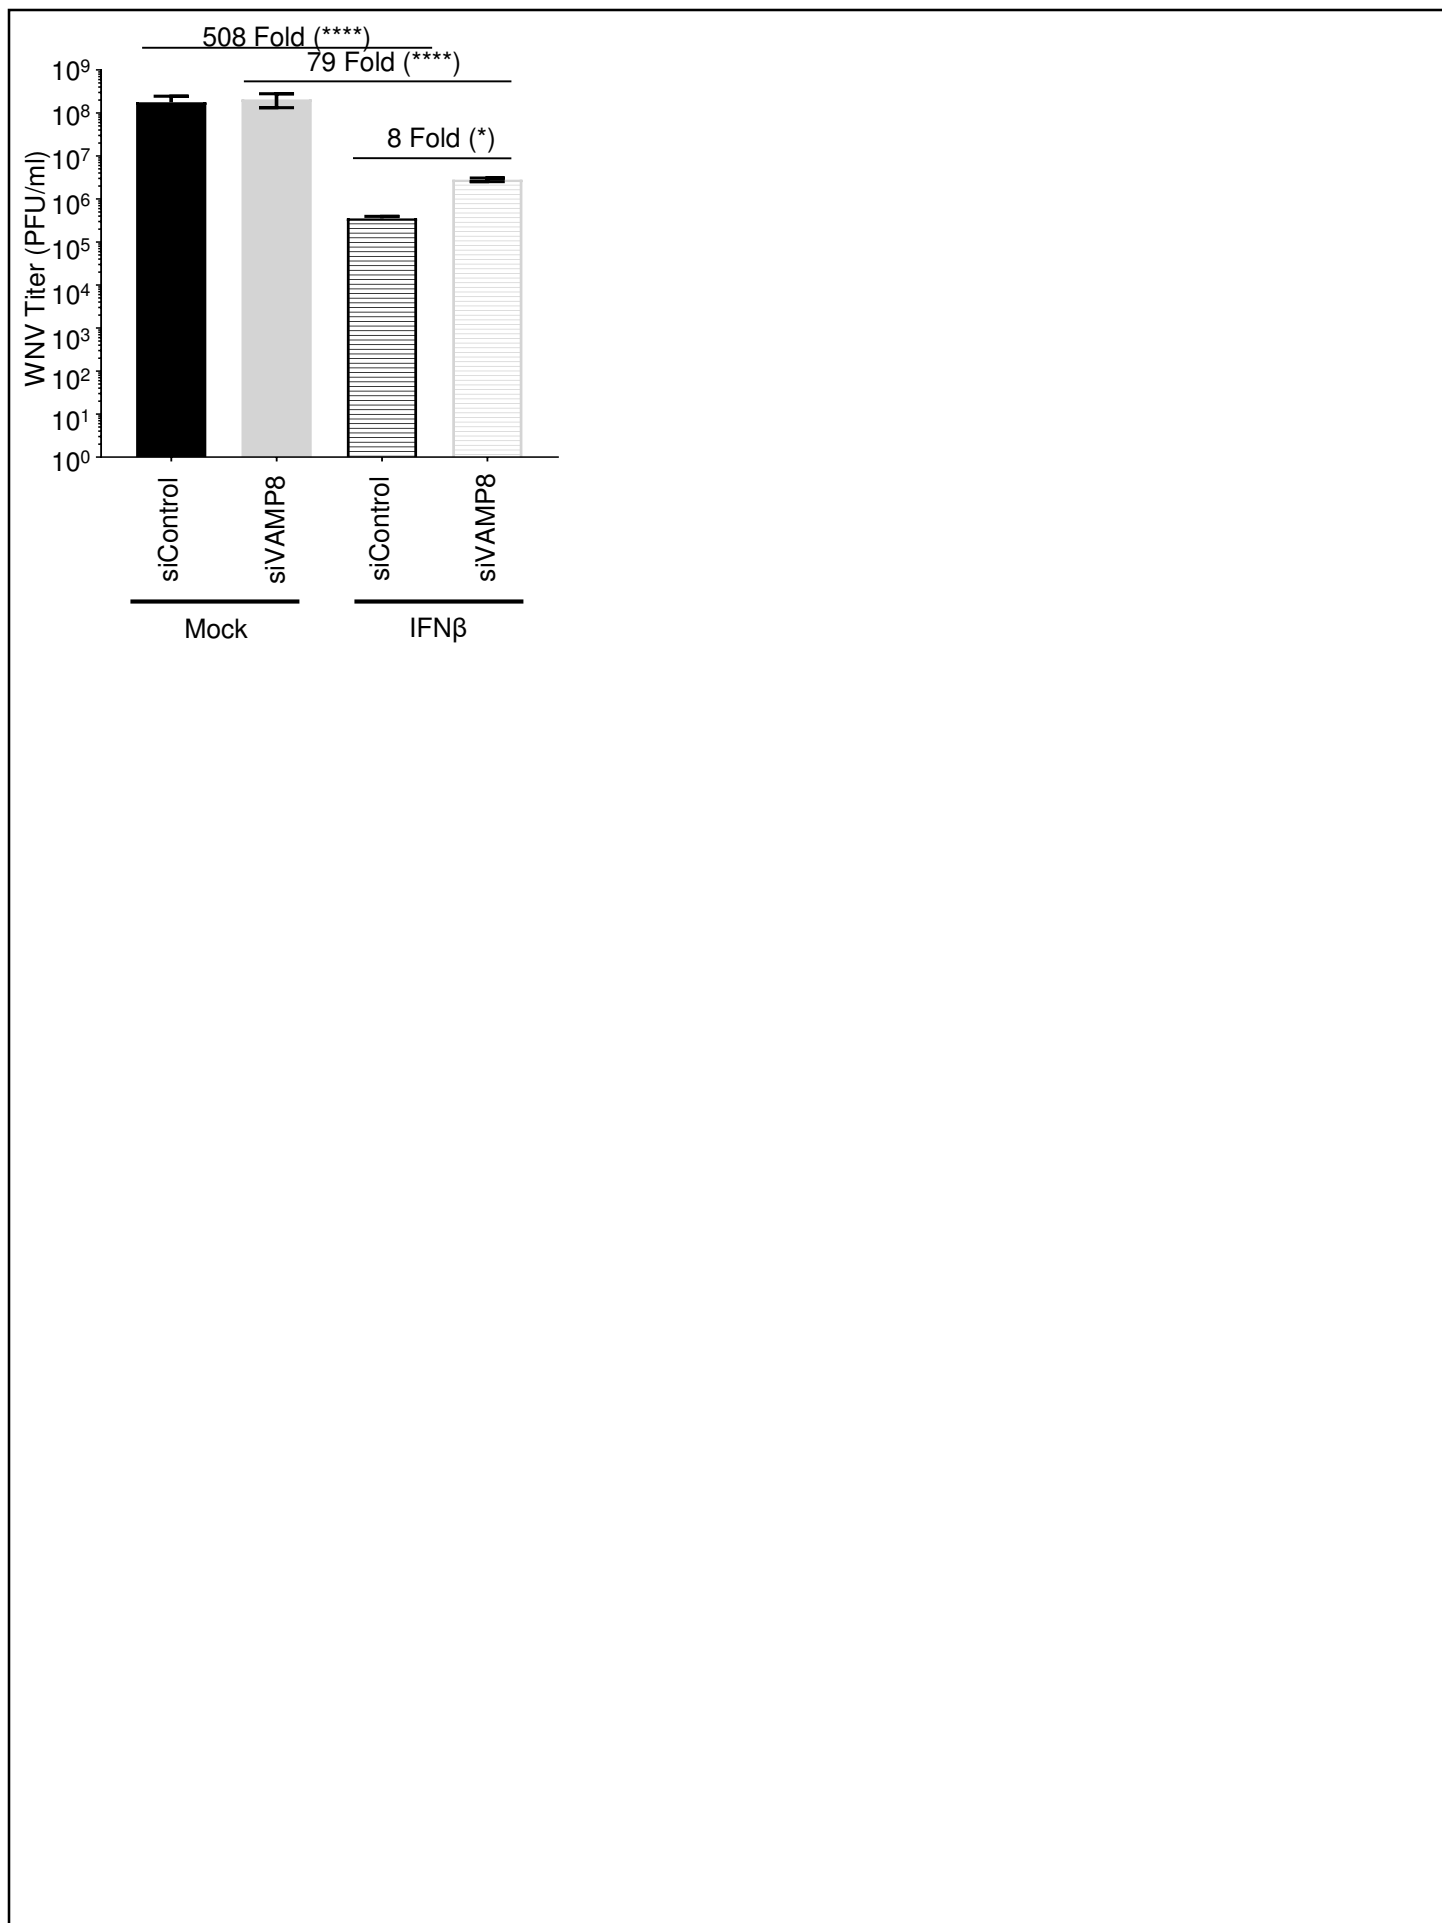

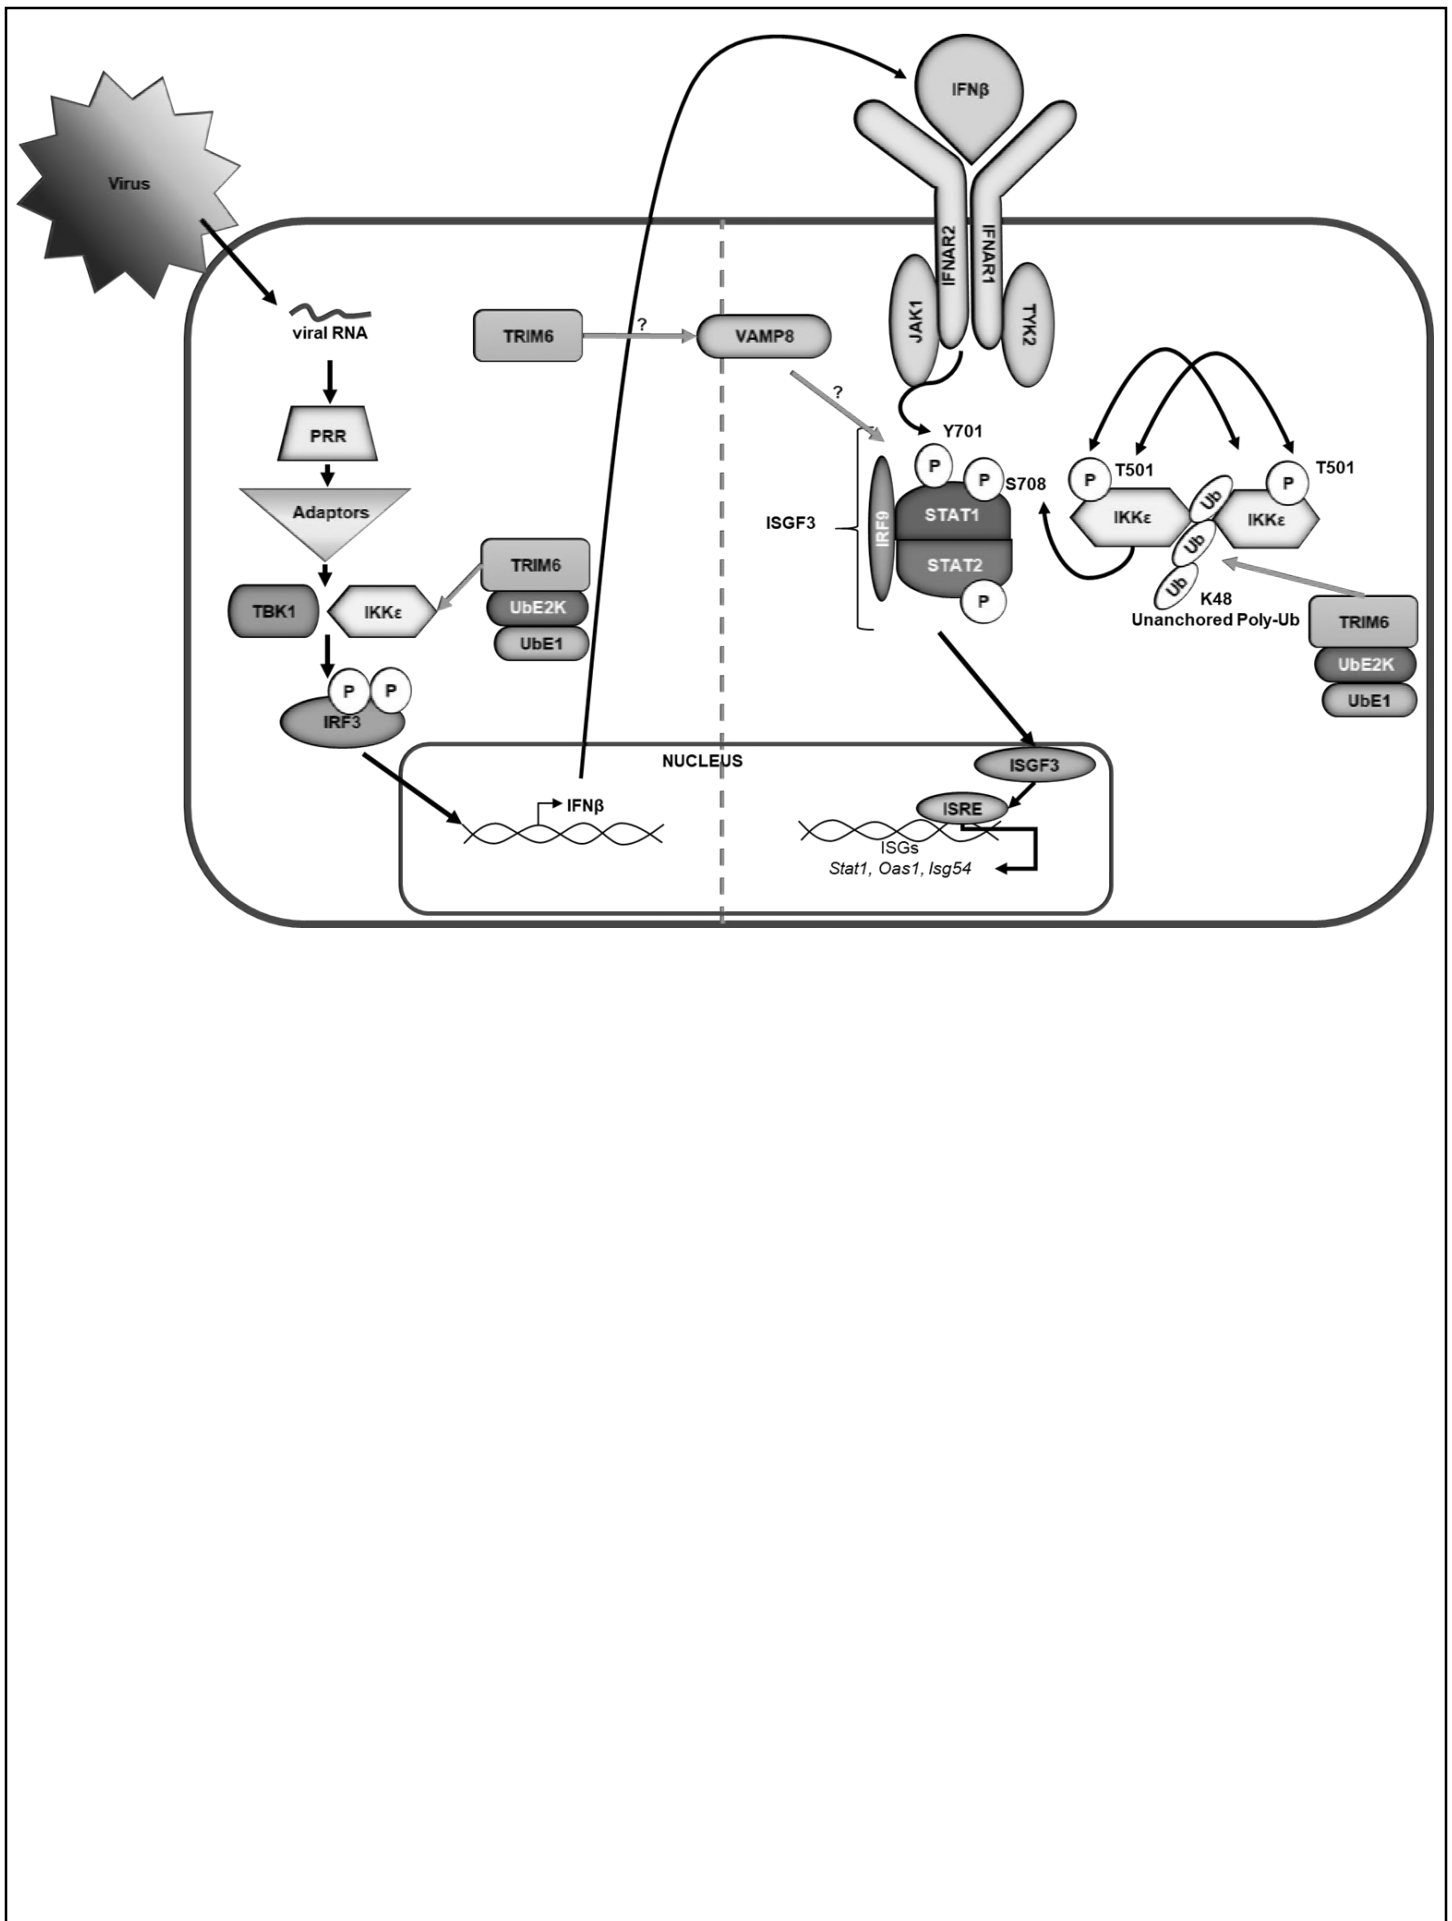

| <b>Primer Name</b> | <b>Primer Sequence</b>  |
|--------------------|-------------------------|
| 18S F              | GTAACCCGTTGAACCCATT     |
| 18S R              | CCATCCAATCGGTAGTAGCG    |
| Ifnb F             | TCTGGCACAACAGGTAGTAGGC  |
| Ifnb R             | GAGAAGCACAACAGGAGAGCAA  |
| Il6 F              | AGAGGCACTGGCAGAAAACAAC  |
| Il6 R              | AGGCAAGTCTCCTCATTGAATCC |
| Irf7 F             | CGCGGCACTAACGACAGGCGAG  |
| Irf7 R             | GCTGCCGTGCCCGGAATTCCAC  |
| Isg54 F            | ATGTGCAACCCTACTGGCCTAT  |
| Isg54 R            | TGAGAGTCGGCCCAGTGATA    |
| Oas1 F             | GATCTCAGAAATACCCCAGCCA  |
| Oas1 R             | AGCTACCTCGGAAGCAGGTT    |
| Stat1 F            | ACAGCAGAGCGCCTGTATTG    |
| Stat1 R            | CAGCTGATCCAAGCAAGCAT    |
| Vamp8 F            | CTTGGAACATCTCCGCAACA    |
| Vamp 8 R           | CGCTGAACACAGAACTTGAG    |
